## Title

Synergism between potassium and nitrate enhances the alleviation of ammonium toxicity in rice seedling root

## Authors:

Gen Fang<sup>1</sup>, Jing Yang<sup>1</sup>, Tong Sun<sup>1</sup>, Xiaoxin Wang<sup>1</sup>, Yangsheng Li<sup>1\*</sup>

<sup>1</sup> State Key Laboratory of Hybrid Rice, College of Life Sciences, Wuhan University, Wuhan, China.

\* Corresponding author

E-mail: [lysh2001@whu.edu.cn](mailto:lysh2001@whu.edu.cn) (YL)

## Abstract

Ammonium toxicity in plants is considered a global phenomenon, but the primary mechanisms remain poorly characterized. Here, we showed that although the addition of potassium ( $K^+$ ) or nitrate ( $NO_3^-$ ) partially alleviated the inhibition of rice root growth caused by ammonium toxicity, the coexistence of  $K^+$  and  $NO_3^-$  clearly improved the alleviation via a synergistic mechanism. The synergism led to significantly improved alleviation effects on root biomass, length, surface area, number and meristem cell number. The aberrant auxin distribution in root tips, rhizosphere acidification level and abnormal cell morphology in the root cap and elongation zone caused by ammonium

toxicity could be recovered by this synergism. RNA sequencing and the weighted gene correlation network analysis (WGCNA) revealed that the mechanism of this synergism involves cellulose synthesis, auxin and gibberellin metabolism regulation at the transcription level.

## **Keywords**

Rice; Root; Synergism; Ammonium toxicity alleviation; Potassium; Nitrate.

## **Introduction**

Compared with nitrate, ammonium is the preferred nitrogen source for paddy rice and many other plant species. While low supply of ammonium promotes plant growth, high supply of ammonium causes toxicity, especially when applied alone [1]. Ammonium toxicity can lead to plant growth retardation, biomass reduction, structural changes, the formation of short and dense root systems and even death [2]. In addition, ammonium toxicity inhibits root cell elongation and affects root geotropism by disturbing auxin distribution in root tips. [3-5]. Cells that absorb excess ammonium actively excrete the ammonium. These transport processes take up a large number of ion channels, resulting in a large waste of energy [6]. To maintain charge balance, plant cells need to pump out protons to counteract the excess ammonium in the cytoplasm, which causes rhizosphere acidification [7]. Ammonium can enter cells through a variety of nonselective cation channels and potassium-specific channels, which competitively inhibit the uptake of potassium [8, 9]. Excessive ammonium assimilation in the

cytoplasm consumes a large amount of carbonic compounds, which results in a lack of carbon sources in plants [10]. The auxin signal in Arabidopsis roots was obviously reduced under ammonium treatment, and exogenous application of auxin could not completely alleviate the toxicity phenotype in the roots [11]. Ammonium toxicity can result in higher lipid peroxidation levels, a higher ratio of the oxidized state of glutathione and ascorbic acid, and higher activity of ROS-scavenging enzymes [12].

The way to alleviate plant ammonium toxicity is to reverse these toxic mechanisms, for instance, by increasing the activity of the ammonium assimilation system, relieving rhizosphere acidification, inhibiting the futile transmembrane ammonium cycling, increasing the supply of other nutrients [1, 2, 13]. Potassium has a significant alleviation effect on ammonium toxicity [4]. A possible reason for this effect is that potassium can competitively suppress the transport of ammonium, thereby reducing futile transmembrane ammonium cycling [14]. Potassium is important to protein anabolism. It affects the synthesis and signaling of auxin, similar to ammonium. Some researchers have reported that the presence of nitrate in the growth medium restores the ammonium toxicity phenotype in the plant, even at a very low nitrate concentration [8]. Since nitrate is an essential signaling molecule for plants, the alleviation effect of nitrate on ammonium toxicity could be extremely complex [15]. Nitrate, as an anionic and oxidized nitrogen source, can mitigate the imbalance of ions and redox states caused by cations and reduce ammonium ions when applied together [16]. The rhizosphere becomes alkalized when plants absorb nitrate, which counteracts the acidification

caused by ammonium absorption [13]. Nitrate alleviates ammonium toxicity without lessening ammonium accumulation, organic acid depletion and inorganic cation depletion in *Arabidopsis thaliana* shoots [17].

In this study, we compared the alleviation effects of  $K^+/NO_3^-/KNO_3$  on ammonium toxicity, and found that combined application of  $K^+$  and  $NO_3^-$  not only showed improved alleviation of ammonium toxicity compared to application of individual ions, but also resulted in some novel beneficial mechanisms, probably due to an undiscovered synergism. We provide morphological and physiological evidence of the existence of this synergism, and we used transcriptome analysis to reveal a regulatory network for cell wall construction related to this synergism.

## Materials and Methods

### Plant materials and growth conditions

The plant materials used in this research included ZH11 (*Oryza sativa japonica*) and DR5:GUS insertion lines (ZH11 background).

Rice seeds were germinated in distilled water for 2 days in a dark environment at 30°C and then transferred into different hydroponic culture media in 400-mL boxes (24 plants per box) and grown in a growth chamber (30°C-14 hour-light/22°C-8 hour-dark cycles, 100  $\mu\text{mol photons m}^{-2} \text{s}^{-1}$  illumination and 80% humidity).

There were 6 groups of hydroponic culture media used in this research: control

(pure water); ammonium toxicity treatment (4 mM NH<sub>4</sub>Cl solution); K<sup>+</sup> alleviation treatment (4 mM NH<sub>4</sub>Cl and 4 mM KCl solution); NO<sub>3</sub><sup>-</sup> alleviation treatment (4 mM NH<sub>4</sub>Cl and 4 mM NaNO<sub>3</sub> solution); K<sup>+</sup> and NO<sub>3</sub><sup>-</sup> synergistic alleviation treatment (4 mM NH<sub>4</sub>Cl and 4 mM KNO<sub>3</sub> solution); Na<sup>+</sup> and Cl<sup>-</sup> alleviation treatment (4 mM NH<sub>4</sub>Cl and 4 mM NaCl solution). No other nutrients existed in the hydroponic culture media except for the ions mentioned above.

If not mentioned, 7-day-old seedlings were harvested for follow-up experiments.

## **Analysis of root morphology**

The whole root area per plant was photographed by a D7000 camera (Nikon, Japan). All the root morphology parameters were measured by SmartRoot software V4.2 [18] according to its user guide.

The root tips were cut and fixed with FAA fixative (1.9% formaldehyde, 4.9% acetic acid, 63% ethanol, m/V) for 2 days and then embedded in paraffin. Then, 6- $\mu$ m-thick slices were obtained with a microtome. After dewaxing with xylene, the sections were placed on glass slides and photographed using a microscope (DM4000B equipped with a DFC490 camera, Leica, Germany).

## **Culture pH measurement**

On day 0/3/5/7 after germination, the pH of the hydroponic culture media of the 5 treatments was measured using a pH meter (PB-10, Sartorius, Germany).

## **DR5:GUS-based auxin distribution assay**

DR5:GUS insertion lines grown under the 5 different treatments were harvested and rinsed in distilled water for 30 s. After fixing in 90% (m/m) acetone in vacuo, the roots were rinsed in GUS staining buffer (50 mM Na<sub>2</sub>HPO<sub>4</sub>, 50 mM NaH<sub>2</sub>PO<sub>4</sub>, 0.1% Triton X-100, 2 mM K<sub>4</sub>[Fe(CN)<sub>6</sub>], 10 mM EDTA) 3 times, and then, they were stained in 5 mL of GUS staining buffer containing 5 µg of X-gluc (Sigma-Aldrich, USA). Images were photographed by a microscope (DM4000B equipped with a DFC490 camera, Leica, Germany).

## **Auxin alleviation treatment**

After germination, rice seeds were transferred into 4 mM NH<sub>4</sub>Cl containing 0/10/15/20 nM IAA/NAA and grown for 14 days. The radicle lengths were measured on day 14.

## **Ion content, enzyme activity and soluble protein content determination in root tissues**

Seedling roots were harvested and rinsed in distilled water for 30 s to remove extracellular ions. Roots were homogenized under liquid N<sub>2</sub> using a mortar and pestle.

For tissue NH<sub>4</sub><sup>+</sup> content determination, 0.2 g of homogenized tissue was mixed with 2 mL of 10 mM precooled formic acid before centrifugation (4°C, 10000 ×g, 10 minutes). The supernatants were analyzed by the o-phthalaldehyde (OPA) method to

determine the  $\text{NH}_4^+$  content using spectrophotometry as described in [19].

For tissue  $\text{NO}_3^-$  content determination, 0.1 g of homogenized tissue was mixed with 1 mL  $\text{H}_2\text{O}$  before centrifugation ( $4^\circ\text{C}$ ,  $10000 \times g$ , 10 minutes). Then, 30  $\mu\text{L}$  of supernatant was mixed with 100  $\mu\text{L}$  of 5% (m/v) salicylic acid- $\text{H}_2\text{SO}_4$ . After reacting for 20 minutes at room temperature, 2 mL of 2 M NaOH was added to the mixture. Sample absorbance was measured at 410 nm, and the  $\text{NO}_3^-$  content was computed according to a standard curve.

The  $\text{K}^+$  content was determined by the atomic absorption spectroscopy (AAS) method using a contraAA700 (Analytik Jena, Thuringia, Germany). After determining the dry root weights, samples were digested with 5 mL of concentrated nitric acid and 1 mL of  $\text{H}_2\text{O}_2$  at  $150^\circ\text{C}$  until the mixtures were transparent. Then, the solutions were diluted to 50 mL with 0.5% nitric acid. The  $\text{K}^+$  content was determined at 404.4 nm.

Homogenized tissue was lysed with Western and IP lysis buffer (Beyotime Biotechnology, Shanghai, China). The soluble protein content was measured with a BCA protein assay kit (Beyotime Biotechnology, Shanghai, China).

GS activity was measured using a GS activity assay kit (Comin Biotechnology, Suzhou, China) as described in [20].

GOGAT activity was measured using a GOGAT activity assay kit (Comin Biotechnology, Suzhou, China) as described in [21].

## Net $^{15}\text{NH}_4$ flux measurement

Rice seedlings were germinated and grown on 4 mM  $^{14}\text{NH}_4\text{Cl}$  for 7 days. After harvesting, their roots were rinsed with 0.1 mM  $\text{CaSO}_4$  immediately for 1 minute. Then, the samples were separated into 4 groups evenly and immersed in 4 mM  $^{15}\text{NH}_4\text{Cl}$ , 4 mM  $^{15}\text{NH}_4\text{Cl}$  + 4 mM KCl, 4 mM  $^{15}\text{NH}_4\text{Cl}$  + 4 mM  $\text{Na}^{14}\text{NO}_3$ , or 4 mM  $^{15}\text{NH}_4\text{Cl}$  + 4 mM  $\text{K}^{14}\text{NO}_3$  for 1 hour. After rinsing again with 0.1 mM  $\text{CaSO}_4$  for 1 minute, the roots from the 4 groups were dried in a 70°C oven for 48 hours. Then, they were homogenized using liquid  $\text{N}_2$ . The proportion of  $^{15}\text{N}$  in the total nitrogen content (m/m), which represents the root surface  $^{15}\text{NH}_4$  influx in 1 hour, was measured by isotope mass spectrometry (isoprime-100, Vario ISOTOPE cube CN).

Rice seedlings were germinated and grown on 4 mM  $^{15}\text{NH}_4\text{Cl}$  solution for 7 days. After harvesting, their roots were rinsed with 0.1 mM  $\text{CaSO}_4$  immediately for 1 minute. Then, the samples were separated into 4 groups evenly and immersed in 4 mM  $^{14}\text{NH}_4\text{Cl}$ , 4 mM  $^{14}\text{NH}_4\text{Cl}$  + 4 mM KCl, 4 mM  $^{14}\text{NH}_4\text{Cl}$  + 4 mM  $\text{Na}^{14}\text{NO}_3$ , or 4 mM  $^{14}\text{NH}_4\text{Cl}$  + 4 mM  $\text{K}^{14}\text{NO}_3$  for 1 hour. After rinsing again with 0.1 mM  $\text{CaSO}_4$  for 1 minute, the roots from the 4 groups were dried in a 70°C oven for 48 hours. Then, they were homogenized using liquid  $\text{N}_2$ . The proportion of  $^{15}\text{N}$  in the total nitrogen content (m/m), which represent the root surface  $^{15}\text{NH}_4$  outflux in 1 hour, was measured by isotope mass spectrometry (isoprime-100, Vario ISOTOPE cube CN).



## Calculation of correlations between traits

Correlations between traits were calculated using the R package `corrplot` (order = "FPC").

## RNA sequencing and data analysis

Total RNA was extracted from 15 sample of ZH11 roots under 5 different treatments (3 biological replications for each treatment, 40 plants for each biological replication). The cDNA libraries were constructed by Personal Biotechnology (Shanghai, China) using the TruSeq RNA Sample Prep Kit (Illumina, USA). mRNA paired-end sequencing was performed using the NextSeq 500 platform (Illumina, USA) by the same company. The raw RNA sequencing reads have been deposited into the NCBI Sequence Read Archive (SRA) under accession NO. PRJNA693667.

After removing the adapter sequences from raw reads, clean reads were obtained by Trimmomatic [22]. The clean reads were mapped to the reference genome of the *Oryza sativa japonica* variety ([ftp://ftp.ensemblgenomes.org/pub/plants/release-36/fasta/oryza\\_sativa/dna/Oryza\\_sativa.IRGSP-1.0.dna.toplevel.fa.gz](ftp://ftp.ensemblgenomes.org/pub/plants/release-36/fasta/oryza_sativa/dna/Oryza_sativa.IRGSP-1.0.dna.toplevel.fa.gz)) using STAR [23], and gene structure information was obtained from EnsemblPlants annotation ([ftp://ftp.ensemblgenomes.org/pub/plants/release-36/gtf/oryza\\_sativa/Oryza\\_sativa.IRGSP-1.0.36.chr.gtf.gz](ftp://ftp.ensemblgenomes.org/pub/plants/release-36/gtf/oryza_sativa/Oryza_sativa.IRGSP-1.0.36.chr.gtf.gz)). The normalized gene expression levels (TMM normalized FPKM) were calculated using Trinity [24]. DESeq2 [25] was used to identify the DEGs. Those with an adjusted p-value ( $p_{adj}$ ) <

0.05 and  $|\log_2FC| > 1$  genes between every pair of groups were considered significant DEGs.

## **WGCNA analysis**

A matrix containing the TMM values of all genes was used as an input file, and 40% of the genes were first filtered out using the `varFilter` command (`var.func = IQR`) in the R package `genefilter`. Then, WGCNA was performed using the R package WGCNA [26]. A suitable beta value of 18 was calculated, and the TOMType was selected as "signed" to construct a coexpression matrix, which divided genes into 15 modules, including 14 valid modules and 1 "gray" module. The correlations between the modules and traits were calculated to select the modules for further analysis. Hub genes were selected using  $MM > 0.9$  and  $GS > 0.8$ .

## **Results**

### **Combined application of potassium and nitrate had a better alleviation effect on ammonium toxicity in rice roots**

We found that the alleviation of ammonium toxicity in the roots of rice seedlings was much more enhanced when  $K^+$  and  $NO_3^-$  were supplied together than when they were supplied separately (Fig 1A, B). Therefore, we speculated that there might be a synergistic mechanism by which  $K^+$  and  $NO_3^-$  participate in ammonium toxicity alleviation. To confirm our hypothesis, we first demonstrated that neither  $Na^+$  nor  $Cl^-$

had any effects on ammonium toxicity and its alleviation (Fig 1B-D). Combined application of  $K^+$  and  $NO_3^-$  had significantly stronger alleviation effects on root length, root surface area and root number than individual application (Fig 2). Under  $NH_4^+$  toxicity treatment, the root cap was enlarged and grew abnormally, which was only restored by  $KNO_3$  (Fig 3B). Both cell production and cell expansion contributed to root growth. Under  $NH_4^+$  toxicity treatment, root meristem size was reduced compared to the control and could be partially restored by  $KCl$  or  $NaNO_3$ , while the meristem zone under the  $KNO_3$  alleviation treatment was longer than that in the control (Fig 3A, C), which indicated that  $KNO_3$  had a significant effect on improving cell division. Cells in the elongation zones of the control and  $KNO_3$  alleviation treatment were similar and were clearly elongated and rectangular, while cells in root elongation zones under the  $NH_4^+$  toxicity and  $KCl$  or  $NaNO_3$  alleviation treatments were elliptical and irregular (Fig 3A). These results indicated that  $KNO_3$  could promote cell division and restore cell elongation better in the roots of rice seedlings under ammonium toxicity.

Under ammonium toxicity, the auxin signal in the rice seedling root tips was markedly weakened compared to that in the control (Fig 3B).  $KCl$  restored the distribution of the auxin signal in the root cap and significantly enhanced the auxin signal in the middle column of the root, while  $NaNO_3$  restored that in only the middle column of the root (Fig 3B). In the case of  $KNO_3$  alleviation, the distribution of the auxin signal was very similar to that in the control (Fig 3B), indicating that  $KNO_3$  had a better alleviation effect on auxin distribution in rice seedling roots. Addition of indole-

3-acetic acid (IAA) or naphthaleneacetic acid (NAA) in the ammonium toxicity treatment increased the lengths of the rice radicles, which further indicated that the alleviation effect of  $\text{KNO}_3$  on root length may be attributed to auxin distribution recovery (Fig 3D). Rhizosphere acidification caused by ammonium toxicity could be alleviated by only  $\text{KNO}_3$  and not by  $\text{KCl}$  or  $\text{NaNO}_3$  (Fig 3E). Therefore, in terms of root phenotype, root biomass, root tip cell morphology, auxin distribution and rhizosphere acidification level, we demonstrated that the synergistic effect of  $\text{K}^+$  and  $\text{NO}_3^-$  enhanced the alleviation of ammonium toxicity in rice seedling roots.

### **The activities of ammonium assimilation metabolisms and the tissue ammonium levels in roots showed a same trend of differences between different treatments**

To analyze how  $\text{K}^+$  and  $\text{NO}_3^-$  alleviated rice  $\text{NH}_4^+$  toxicity, we measured the  $\text{NH}_4^+$  content in roots under different treatments. The  $\text{NH}_4^+$  content under the ammonium toxicity treatment was the highest among all treatments (Fig 4A). Both  $\text{KCl}$  and  $\text{KNO}_3$  reduced the  $\text{NH}_4^+$  content to a level comparable to that of the control, while the alleviation effect of  $\text{NaNO}_3$  was weaker (Fig 4A). These results suggested that both potassium and nitrate could alleviate root ammonium toxicity by reducing the net influx of ammonium. Furthermore, we compared the effects of  $\text{K}^+$  and  $\text{NO}_3^-$  on root  $\text{NH}_4^+$  influx and efflux using  $^{15}\text{N}$ -labeled  $\text{NH}_4\text{Cl}$ .  $\text{K}^+$  was able to reduce  $\text{NH}_4^+$  influx and efflux, while  $\text{NO}_3^-$  was only able to reduce  $\text{NH}_4^+$  efflux (Fig 4B, C). However, consistent with the  $\text{NH}_4^+$  content, the impacts of  $\text{KCl}$  and  $\text{KNO}_3$  on root  $\text{NH}_4^+$  influx

and efflux were largely the same, suggesting that the differences in ammonium toxicity alleviation between KCl and KNO<sub>3</sub> could not be attributed to the regulation of root NH<sub>4</sub><sup>+</sup> content. In addition, the GS, GOGAT enzyme activities and protein levels in the roots showed similar trends of differences among different treatment groups (Fig 4D-F).

We further measured the K<sup>+</sup> and NO<sub>3</sub><sup>-</sup> levels in roots under different treatments. The coexistence of K<sup>+</sup> and NO<sub>3</sub><sup>-</sup> in the culture medium facilitated the absorption of both ions in rice roots (Fig 4G, H). However, the correlation analysis indicated that there was no correlation between K<sup>+</sup> or NO<sub>3</sub><sup>-</sup> content and root growth (Fig 5).

## **Transcriptome analysis roughly revealed some related systems involved in this synergism**

Whole-transcriptome analysis revealed that the number of differentially expressed genes (DEGs;  $|\log_2FC| > 1$  and adjusted p value  $< 0.05$ ) in each treatment compared to the control were in inverse proportion to the root biomass in corresponding treatment (Fig 6A, 1C-D). From these DEGs, we randomly selected 24 genes that appeared in all 4 groups to detect their expression level by quantitative real-time polymerase chain reaction (qRT-PCR), and all 24 gene expression differences among the 5 treatments were consistent with the corresponding fragments per kilobase per million (FPKM) values generated from transcriptome analysis, which verifies the validity of the RNA-Seq analysis results (S2 Fig). We defined 4365 DEGs between the NH<sub>4</sub>Cl treatment

and the control as toxicity-related genes (Fig 6A). To further investigate the unique role of KNO<sub>3</sub> in the alleviation of NH<sub>4</sub><sup>+</sup> toxicity, we compared the number of genes among the toxicity-related genes whose expression returned to levels comparable to that in the control ( $|\log_2FC| < 1$  and adjusted p value  $< 0.05$ ) under different alleviation treatments. There were 1716, 1335 and 2492 genes that met these requirements in DEG groups of the KCl, NaNO<sub>3</sub> and KNO<sub>3</sub> treatments, respectively (Fig 6B). These genes were treated as alleviation-related genes. There were 812 genes whose expression could only be recovered under KNO<sub>3</sub> alleviation conditions (Fig 6B), further suggesting that a synergism existed between K<sup>+</sup> and NO<sub>3</sub><sup>-</sup>.

To gain further insight into the possible processes involved in NH<sub>4</sub><sup>+</sup> toxicity and alleviation, we examined the distributions of toxicity-related genes and alleviation-related genes based on pathway enrichment (KEGG) analysis (S1A Fig) and gene ontology (GO) classification (S1B Fig). The results of KEGG and GO showed that the synergism of K<sup>+</sup> and NO<sub>3</sub><sup>-</sup> generated new alleviation mechanisms via changes in gene expression related to stress responses, redox states and metabolism.

## **Correlation network analysis by WGCNA allowed in-depth analysis of this synergism**

To characterize the gene expression changes that occurred under different treatments, we clustered the expression patterns by the weighted gene correlation network analysis (WGCNA) method, leading to the identification of 15 distinct

WGCNA modules (Fig 7A, C). Analysis of the module-trait relationships revealed that the ‘turquoise’ module was highly positively correlated with root biomass and all root traits except for root diameter (Fig 7C). The ‘turquoise’ module was also highly negatively correlated with GOGAT enzyme activity and protein concentration (Fig 7C). Analysis of trait correlation revealed that GOGAT enzyme activity and protein concentration were highly negatively correlated with all root traits except for root diameter (Fig 5). Therefore, the genes of the ‘turquoise’ module were considered to play an important role in root growth. The ‘yellow’ module was highly positively correlated with GOGAT enzyme activity, protein concentration and ammonium concentration (Fig 7C). The genes of the ‘yellow’ module might be negatively associated with root growth.

There were 507 genes in the ‘turquoise’ module and 115 genes in the ‘yellow’ module whose expression was differentially regulated by  $\text{NH}_4^+$  toxicity and specifically recovered by  $\text{KNO}_3$  (Fig 7B). These genes whose expression was highly correlated with traits might be responsible for the specific synergistic alleviation effect on root growth. We used module membership (MM) > 0.9 and gene significance (GS) > 0.8 as parameters to identify hub genes among the 507 genes and found 62 hub genes (S1 Table). The coexpression network was visualized by Cytoscape with WGCNA edge weight > 0.35 (S1C Fig). Several genes involved in cell wall formation were identified in the network, such as genes associated with cellulose synthesis (OsCesA4, OsCesA7, OsCesA9), lignin catabolic process (Os01g0850700), cell wall modification

(OsEXPB5) and cell wall proteins (OsFLA11, OsFLA27) (S1 Table). These results suggested that under ammonium toxicity conditions, KNO<sub>3</sub> could specifically restore the expression of genes related to cell wall formation and then alleviate the effects of NH<sub>4</sub><sup>+</sup> toxicity on cell morphology and root growth by restoring cell wall formation.

## **Construction of the cell wall regulation network related to this synergism**

Based on these findings, we re-examined the expression of genes associated with root cell formation. Cellulose is an important component of the cell wall. Analysis of the transcription regulation network for cellulose synthesis revealed that OsNAC29 and OsNAC62 directly regulate OsMYB61, which in turn activates the expression of cellulose synthase genes (CESAs), such as OsCESA4, OsCESA7 and OsCESA9 [27]. The expression of OsMYB61 and OsCESAs is negatively regulated by OsIIP4, which does not bind their promoters and interacts with OsNAC29 [28]. Our result showed that the expression of these genes was repressed under NH<sub>4</sub>Cl treatment, and KNO<sub>3</sub> resulted in a better recovery of the expression of these genes (Fig 8). Furthermore, similar results were observed with OsCSLF6 and OsIRX10 (Fig 8), which are in the hemicellulose synthesis pathway. Thus, the cellulose and hemicellulose synthesis pathways mentioned here might be a regulatory mechanism induced by the synergism.

Xyloglucan endotransglucosylases/hydrolases (XTHs) play an important role in the construction of the primary cell wall by mediating the cleavage and rejoining of β-



(1-4)-xyloglucans. There were two XTH genes (OsXTH8 and OsXTH2) among the 507 genes. OsXTH8 is upregulated by gibberellin (GA) and highly expressed in vascular bundles of the leaf sheath and young roots where cells are actively undergoing elongation and differentiation [29]. OsXTH2 is also upregulated by GA [30]. GA can be converted to nonbiologically active GA in plants by 2 $\beta$ -hydroxylation, a reaction catalyzed by GA 2-oxidase. OsGA2ox1 encodes a GA 2-oxidase, which is functional in vitro and in vivo [31]. Our result showed that KNO<sub>3</sub> could result in better recovery of the expression levels of OsXTH8, OsXTH2 and OsGA2ox1 under NH<sub>4</sub>Cl toxicity (Fig 8). This result suggested that the GA metabolic pathway mentioned here was disrupted by ammonium toxicity, leading to abnormal root cell elongation, which could be effectively recovered by the synergistic effects of KNO<sub>3</sub>.

Auxin is known to stimulate cell elongation by increasing cell wall extensibility. The OsGH3 protein controls auxin homeostasis by catalyzing the conjugation of IAA to amino acids. Overexpression of OsGH3-2 reduces the free-IAA level [32], and downregulation of OsGH3-8 shows auxin overproduction phenotypes [33]. Again, our result showed that the expression levels of OsGH3-2 and OsGH3-8 were upregulated by NH<sub>4</sub>Cl treatment, and high expression was maintained under the KCl and NaNO<sub>3</sub> treatments (Fig 8). Only the KNO<sub>3</sub> treatment restored the expression of these two genes to the control level, which was consistent with the auxin distribution result indicated by DR5:GUS (Fig 3B). Thus, the synergistic effects could also regulate the auxin pathways to result in enhanced beneficial effects on rice roots under NH<sub>4</sub><sup>+</sup> treatment.

## Discussion

### **Potassium and nitrate had a synergistic effect on ammonium toxicity alleviation in rice roots**

It is widely known that supplementation with nitrate or potassium alleviates ammonium toxicity in plants [1, 4, 16]. We found that the addition of  $\text{KNO}_3$  resulted in significantly enhanced promotion of root growth compared to that of  $\text{KCl}$  or  $\text{NaNO}_3$ . In terms of root tip cell morphology, auxin distribution, and pH changes in the rhizosphere, the addition of  $\text{KNO}_3$  produced some alleviation effects that could not be produced by  $\text{K}^+$  or  $\text{NO}_3^-$  alone, suggesting the existence of a synergistic effect of  $\text{K}^+$  and  $\text{NO}_3^-$  on  $\text{NH}_4^+$  toxicity alleviation.

Qing Li's study concluded that ammonium inhibited root cell elongation rather than proliferation in plants [3]. Ying Liu's study found that the inhibitory effect of ammonium on main-root elongation was mainly achieved by reducing the length of the meristem and elongation zones, and root cell elongation was also inhibited [5]. Our results showed that ammonium toxicity caused irregular cell morphology, impaired cell elongation, and loss of auxin signaling.  $\text{KNO}_3$  treatment effectively restored root cell morphology, resulting in a regular cell arrangement and a recovered auxin distribution that was almost the same as that of the control.

## **This synergism could specifically regulate gene expression associated with root growth and ammonium assimilation**

$\text{NH}_4^+$  causes changes in gene expression in plant roots, which in turn leads to a series of changes in root growth.  $\text{K}^+$  and  $\text{NO}_3^-$  restored the expression of some of these genes to levels comparable to those in the control. Therefore, the restoration of the expression of these genes represents an intrinsic mechanism of ammonium toxicity alleviation by these two ions. We identified 812 genes whose expression was specifically restored by  $\text{KNO}_3$  but not by  $\text{KCl}$  or  $\text{NaNO}_3$ , suggesting that the synergism between  $\text{K}^+$  and  $\text{NO}_3^-$  activates specific transcriptional regulation to alleviate ammonium toxicity in roots.

Coexpression network analysis can be used for the investigation of thousands of genes with identical expression patterns. It is an important and excellent method for gene interaction analysis and interpretation of molecular mechanisms [34]. We identified a “turquoise” module that was highly positively correlated with almost all root traits (except for root diameter) and a “yellow” module that was highly positively correlated with tissue ammonium content and ammonium assimilation. The correlation analysis of the traits showed a negative correlation between most root traits and the ammonium assimilation. Therefore, we hypothesized that gene expression in these two modules is positively and negatively correlated with root growth. Among the 812 alleviation-related genes whose expression was specifically regulated by  $\text{KNO}_3$ , 507 genes belonged to the ‘turquoise’ module and 115 genes belonged to the ‘yellow’

module. So the specific synergistic alleviation effect of  $\text{KNO}_3$  on root ammonium toxicity might be mainly achieved by regulation of the expression of these genes. No significant enrichment of GO terms was found in the 115 genes. The 507 genes were predominantly enriched in GO terms such as oxidation reduction, carbohydrate metabolic process, lignin catabolic process and response to oxidation stress. Furthermore, we identified 62 hub genes from the 507 genes. Mapman analysis [35] of these hub genes showed that they were enriched in three categories: genes associated with cell wall formation, various enzymes and transporters. Some genes were significantly associated with root growth traits and cell wall formation, so changes in their expression could result in different morphologies of root tip cells under ammonium toxicity or different alleviation conditions.

## **This synergism alleviates root ammonium toxicity by regulating root cell wall formation**

With changes in external nutrients, the composition of the cell wall determines the morphology of root cells and tissues, further influencing plant growth [36]. Although there is growing evidence that reprogramming of cell wall genes is critical for plant adaptation to nutritional status, an understanding of the molecular mechanisms that control these changes is now emerging. In crops, nitrogen status affects the mechanical strength and disease resistance of stems, which are regulated by cell wall organization and strength, suggesting that cell wall structure is regulated by nitrogen status [36, 37]. The expression of genes associated with lignin and cellulose synthesis is significantly

downregulated when rice is grown in a high-nitrogen environment [37, 38]. Consistent with this phenomenon, a high-nitrogen growth environment causes a significant decrease in cellulose and lignin in the root cell wall, while nitrogen deficiency causes an increase in cellulose in roots [39].

Based on DEG analysis and WGCNA, we revealed a transcriptional regulatory network of genes associated with rice root cell wall formation that are affected by nutritional status (Fig 4, S2 Table). Our results showed that the cell wall formation in rice roots was related not only to nitrogen status but also to interactions between different nutrients. Separate addition of nitrate and potassium into the ammonium growth environment could not effectively alleviate the damage to cell wall formation, while the mixture of nitrate and potassium could effectively restore the expression of genes related to cell wall synthesis, thus restoring cell wall formation. Moreover, these processes also involve hormonal pathways such as the auxin and GA pathways. These results suggest that the effects of nitrogen on cell wall formation involve not only the morphological impact of nitrogen itself (ammonium or nitrate) but also the synergism between nitrogen and other nutrients (potassium). This is also consistent with the fact that, in agricultural practices, mixed fertilizer application results in better crop growth performance. An in-depth study of these mechanisms will reveal the link between environmental nutrition and crop growth and provide a theoretical basis for resolving the conflict between high yield and poor disease resistance in crops by improving fertilizer utilization efficiency.

## Acknowledgements

This work was supported by the National Key Research and Development Program of China [grant number 2016YFD0100400] and the National Special Key Project for Transgenic Breeding [grant number 2016ZX08001001].

## References

1. Bittsanszky A, Pilinszky K, Gyulai G, Komives T. Overcoming ammonium toxicity. *Plant science : an international journal of experimental plant biology*. 2015;231:184-90. doi: 10.1016/j.plantsci.2014.12.005. PubMed PMID: 25576003.
2. Silva G, Prado R, Ferreira R. Absorption of nutrients, growth and nutritional disorders resulting from ammonium toxicity in rice and spinach plants. *Emirates Journal of Food and Agriculture*. 2016;28(12). doi: 10.9755/ejfa.2016-09-1294.
3. Li Q, Li BH, Kronzucker HJ, Shi WM. Root growth inhibition by NH<sub>4</sub><sup>(+)</sup> in Arabidopsis is mediated by the root tip and is linked to NH<sub>4</sub><sup>(+)</sup> efflux and GMPase activity. *Plant, cell & environment*. 2010;33(9):1529-42. doi: 10.1111/j.1365-3040.2010.02162.x. PubMed PMID: 20444215.
4. Zou N, Li B, Dong G, Kronzucker HJ, Shi W. Ammonium-induced loss of root gravitropism is related to auxin distribution and TRH1 function, and is uncoupled from the inhibition of root elongation in Arabidopsis. *J Exp Bot*. 2012;63(10):3777-88. doi: 10.1093/jxb/ers068. PubMed PMID: 22407650.

5. Liu Y, Lai N, Gao K, Chen F, Yuan L, Mi G. Ammonium inhibits primary root growth by reducing the length of meristem and elongation zone and decreasing elemental expansion rate in the root apex in *Arabidopsis thaliana*. *PloS one*. 2013;8(4):e61031. doi: 10.1371/journal.pone.0061031. PubMed PMID: 23577185; PubMed Central PMCID: PMC3620058.
6. Britto DT, Siddiqi MY, Glass AD, Kronzucker HJ. Futile transmembrane NH<sub>4</sub>(+) cycling: a cellular hypothesis to explain ammonium toxicity in plants. *Proceedings of the National Academy of Sciences of the United States of America*. 2001;98(7):4255-8. doi: 10.1073/pnas.061034698. PubMed PMID: 11274450; PubMed Central PMCID: PMC31212.
7. Andrews M, Raven JA, Lea PJ. Do plants need nitrate? The mechanisms by which nitrogen form affects plants. *Annals of Applied Biology*. 2013;163(2):174-99. doi: 10.1111/aab.12045.
8. Britto DT. NH<sub>4</sub><sup>+</sup> toxicity in higher plants: a critical review. 2002.
9. Ariz I, Esteban R, Garcia-Plazaola JI, Becerril JM, Aparicio-Tejo PM, Moran JF. High irradiance induces photoprotective mechanisms and a positive effect on NH<sub>4</sub><sup>+</sup> stress in *Pisum sativum* L. *Journal of plant physiology*. 2010;167(13):1038-45. doi: 10.1016/j.jplph.2010.02.014. PubMed PMID: 20434233.
10. Roosta HR, Schjoerring JK. Effects of Ammonium Toxicity on Nitrogen Metabolism and Elemental Profile of Cucumber Plants. *Journal of Plant Nutrition*. 2007;30(11):1933-51. doi:

10.1080/01904160701629211.

11. Yang H, von der Fecht-Bartenbach J, Friml J, Lohmann JU, Neuhäuser B, Ludewig U.

Auxin-modulated root growth inhibition in *Arabidopsis thaliana* seedlings with ammonium as the sole nitrogen source %J *Functional Plant Biology*. 2015;42(3):239-51. doi: <https://doi.org/10.1071/FP14171>.

12. Patterson K, Cakmak T, Cooper A, Lager I, Rasmusson AG, Escobar MA. Distinct signalling pathways and transcriptome response signatures differentiate ammonium- and nitrate-supplied plants. *Plant Cell Environ*. 2010;33(9):1486-501. doi: 10.1111/j.1365-3040.2010.02158.x. PubMed PMID: 20444219; PubMed Central PMCID: PMC2920365.

13. Esteban R, Ariz I, Cruz C, Moran JF. Review: Mechanisms of ammonium toxicity and the quest for tolerance. *Plant science : an international journal of experimental plant biology*. 2016;248:92-101. doi: 10.1016/j.plantsci.2016.04.008. PubMed PMID: 27181951.

14. Ten Hoopen F, Cuin TA, Pedas P, Hegelund JN, Shabala S, Schjoerring JK, et al. Competition between uptake of ammonium and potassium in barley and *Arabidopsis* roots: molecular mechanisms and physiological consequences. *J Exp Bot*. 2010;61(9):2303-15. doi: 10.1093/jxb/erq057. PubMed PMID: 20339151; PubMed Central PMCID: PMC2877888.

15. Xuan W, Beeckman T, Xu G. Plant nitrogen nutrition: sensing and signaling. *Curr Opin Plant Biol*. 2017;39:57-65. doi: 10.1016/j.pbi.2017.05.010. PubMed PMID: 28614749.

16. Hachiya T, Sakakibara H. Interactions between nitrate and ammonium in their uptake,



allocation, assimilation, and signaling in plants. *J Exp Bot.* 2017;68(10):2501-12. doi: 10.1093/jxb/erw449. PubMed PMID: WOS:000404131000005.

17. Takushi H, Watanabe CK, Masaru F, Toshiki I, Kentaro T, Maki KY, et al. Nitrate addition alleviates ammonium toxicity without lessening ammonium accumulation, organic acid depletion and inorganic cation depletion in *Arabidopsis thaliana* shoots. *Plant & Cell Physiology.* 2012;53(3):577-91.

18. Lobet G, Pagès L, Draye X. A Novel Image-Analysis Toolbox Enabling Quantitative Analysis of Root System Architecture. *Plant Physiology.* 2011;157(1):29-39. doi: 10.1104/pp.111.179895.

19. BALKOS KD, BRITTO DT, KRONZUCKER HJ. Optimization of ammonium acquisition and metabolism by potassium in rice (*Oryza sativa* L. cv. IR-72). *Plant, cell & environment.* 2010;33(1):23-34. doi: <https://doi.org/10.1111/j.1365-3040.2009.02046.x>.

20. Yu X, Wang B, Zhang C, Xu W, He J, Zhu L, et al. Effect of root restriction on nitrogen levels and glutamine synthetase activity in 'Kyoho' grapevines. *Scientia Horticulturae.* 2012;137:156-63. doi: <https://doi.org/10.1016/j.scienta.2012.01.025>.

21. Vance GCP. Root Nodule Enzymes of Ammonia Assimilation in Alfalfa (*Medicago sativa* L.). Developmental Patterns and Response to Applied Nitrogen. *Plant Physiology.* 1981;67(6):1198-203.

22. Bolger AM, Lohse M, Usadel B. Trimmomatic: a flexible trimmer for Illumina sequence data.

Bioinformatics. 2014;30(15):2114-20. doi: 10.1093/bioinformatics/btu170.

23. Dobin A, Davis CA, Schlesinger F, Drenkow J, Zaleski C, Jha S, et al. STAR: ultrafast universal RNA-seq aligner. Bioinformatics. 2012;29(1):15-21. doi: 10.1093/bioinformatics/bts635.

24. Grabherr MG, Haas BJ, Yassour M, Levin JZ, Amit I. Trinity: reconstructing a full-length transcriptome without a genome from RNA-Seq data. Nature Biotechnology. 2013;29:644.

25. Anders S. Differential gene expression analysis based on the negative binomial distribution. Journal of Marine Technology & Environment. 2009;2(2).

26. Langfelder P, Horvath S. WGCNA: an R package for weighted correlation network analysis. BMC Bioinformatics. 2008;9:559. Epub 2008/12/31. doi: 10.1186/1471-2105-9-559. PubMed PMID: 19114008; PubMed Central PMCID: PMC2631488.

27. Huang D, Wang S, Zhang B, Shang-Guan K, Shi Y, Zhang D, et al. A Gibberellin-Mediated DELLA-NAC Signaling Cascade Regulates Cellulose Synthesis in Rice. Plant Cell. 2015;27(6):1681-96. doi: 10.1105/tpc.15.00015. PubMed PMID: 26002868; PubMed Central PMCID: PMC4498200.

28. Zhang D, Xu Z, Cao S, Chen K, Li S, Liu X, et al. An Unconventional CCCH-Tandem Zinc-Finger Protein Represses Secondary Wall Synthesis and Controls Mechanical Strength in Rice. Mol Plant. 2018;11(1):163-74. Epub 2017/11/28. doi: 10.1016/j.molp.2017.11.004. PubMed PMID: 29175437.

29. Jan A, Yang G, Nakamura H, Ichikawa H, Kitano H, Matsuoka M, et al. Characterization of a xyloglucan endotransglucosylase gene that is up-regulated by gibberellin in rice. *Plant Physiol.* 2004;136(3):3670-81. Epub 2004/11/02. doi: 10.1104/pp.104.052274. PubMed PMID: 15516498; PubMed Central PMCID: PMCPMC527165.
30. Uozu S, Tanaka-Ueguchi M, Kitano H, Hattori K, Matsuoka M. Characterization of XET-related genes of rice. *Plant Physiol.* 2000;122(3):853-9. Epub 2000/03/11. doi: 10.1104/pp.122.3.853. PubMed PMID: 10712549; PubMed Central PMCID: PMCPMC58921.
31. Sakamoto T, Kobayashi M, Itoh H, Tagiri A, Kayano T, Tanaka H, et al. Expression of a gibberellin 2-oxidase gene around the shoot apex is related to phase transition in rice. *Plant Physiol.* 2001;125(3):1508-16. Epub 2001/03/13. doi: 10.1104/pp.125.3.1508. PubMed PMID: 11244129; PubMed Central PMCID: PMCPMC65628.
32. Du H, Wu N, Fu J, Wang S, Li X, Xiao J, et al. A GH3 family member, OsGH3-2, modulates auxin and abscisic acid levels and differentially affects drought and cold tolerance in rice. *J Exp Bot.* 2012;63(18):6467-80. Epub 2012/11/01. doi: 10.1093/jxb/ers300. PubMed PMID: 23112280; PubMed Central PMCID: PMCPMC3504496.
33. Yadav SR, Khanday I, Majhi BB, Veluthambi K, Vijayraghavan U. Auxin-responsive OsMGH3, a common downstream target of OsMADS1 and OsMADS6, controls rice floret fertility. *Plant Cell Physiol.* 2011;52(12):2123-35. Epub 2011/10/22. doi: 10.1093/pcp/pcr142. PubMed PMID: 22016342.

34. Langfelder P, Horvath S. WGCNA: an R package for weighted correlation network analysis.

BMC Bioinformatics. 2008;9(1):559. doi: 10.1186/1471-2105-9-559.

35. Thimm O, Bläsing O, Gibon Y, Nagel A, Meyer S, Krüger P, et al. mapman: a user-driven tool to display genomics data sets onto diagrams of metabolic pathways and other biological processes. The Plant Journal. 2004;37(6):914-39. doi: [https://doi.org/10.1111/j.1365-](https://doi.org/10.1111/j.1365-313X.2004.02016.x)

[313X.2004.02016.x](https://doi.org/10.1111/j.1365-313X.2004.02016.x).

36. Ogden M, Hoefgen R, Roessner U, Persson S, Khan GA. Feeding the Walls: How Does Nutrient Availability Regulate Cell Wall Composition? Int J Mol Sci. 2018;19(9). Epub 2018/09/12. doi: 10.3390/ijms19092691. PubMed PMID: 30201905; PubMed Central PMCID: PMC6164997.

37. Zhang W, Wu L, Ding Y, Yao X, Wu X, Weng F, et al. Nitrogen fertilizer application affects lodging resistance by altering secondary cell wall synthesis in japonica rice (*Oryza sativa*). J Plant Res. 2017;130(5):859-71. Epub 2017/04/30. doi: 10.1007/s10265-017-0943-3. PubMed PMID: 28451936.

38. Wang C, Wu Ruan R, Hui Yuan X, Hu D, Yang H, Li Y, et al. Effects of Nitrogen Fertilizer and Planting Density on the Lignin Synthesis in the Culm in Relation to Lodging Resistance of Buckwheat. Plant Production Science. 2015;18(2):218-27. doi: 10.1626/pp.s.18.218.

39. Zhang J, Xu L, Wang F, Deng M, Yi K. Modulating the root elongation by phosphate/nitrogen starvation in an OsGLU3 dependant way in rice. Plant signaling & behavior.

---

2012;7(9):1144-5. Epub 2012/08/18. doi: 10.4161/psb.21334. PubMed PMID: 22899054;

PubMed Central PMCID: PMC3489647.

## Figure legends

**Fig 1. KNO<sub>3</sub> had a better alleviation effect on NH<sub>4</sub><sup>+</sup> toxicity in rice roots than KCl or NaNO<sub>3</sub>.** Phenotype of rice seedlings under different growth conditions for 10 days (A) and 7 days (B). Fresh weight (FW) (C) and dry weight (DW) (D) of roots of 7-day-old seedlings. Scale bars = 5 cm. The data are the means ± SDs; t-tests were used to identify significant differences, and different letters represent significant differences among different treatments ( $p < 0.05$ ).

**Fig 2. Root architecture statistics indicated significantly stronger alleviation effects when K<sup>+</sup> and NO<sub>3</sub><sup>-</sup> were applied together.** (A) Phenotypes of roots grown for 7 days. The length (B), surface area (C), volume (D) and diameter (I) of radicles were measured. The total length (E), surface area (F), volume (G) and average diameter (J) of the crown root (CR) were measured, and the number (H) of CRs was counted. Scale bar = 2 cm. The data are the means ± SDs; t-tests were used to identify significant differences, and different letters represent significant differences among different treatments ( $p < 0.05$ ).

**Fig 3. Only KNO<sub>3</sub> could restore the cell phenotypes and auxin distributions of root tips and the rhizosphere acidification.** Paraffin sectioning (A) and GUS staining (B) were performed on 7-day-old seedling radicles. The boundary of the meristem zone and

---

elongation zone is marked by white arrowheads (A). The meristem zone (MZ) is marked by red arrowheads (A), and MZ lengths were measured (C). The roots shown in these photos were the most representative samples selected from 10 seedlings in each treatment. Rice seedlings were grown for 7 days under  $\text{NH}_4^+$  toxicity treatment with different concentrations of IAA or NAA, and then, radicle lengths were measured (D). The pH of the culture solutions of different treatment was measured every 2 days from the 3<sup>rd</sup> day after seed germination (E). Scale bars = 50  $\mu\text{m}$ . The data are the mean  $\pm$  SDs; t-tests were used to identify significant differences; different letters represent significant differences among different treatments ( $p < 0.05$ ) for (C); “\*” ( $p < 0.05$ ) and “\*\*” ( $p < 0.01$ ) represent a significant differences compared to the control (0 nM hormone concentration) (for D), or between each alleviation treatment and  $\text{NH}_4^+$  toxicity treatment (for E).

**Fig 4. The activities of ammonium assimilation metabolisms and the tissue ammonium levels in roots showed a same trend of differences between different treatments.** Rice seedlings were grown for 7 days under different treatments, and then, the roots were used to measure tissue ammonium (A), potassium (G), nitrate (H) and protein (F) levels, as well as to determine GS (D) and GOGAT (E) enzyme activities. For the  $^{15}\text{NH}_4^+$  transport assay, rice seedlings were grown for 7 days in  $^{14}\text{NH}_4\text{Cl}$  (for B) or  $^{15}\text{NH}_4\text{Cl}$  (for C) solution and then transferred to solutions containing  $^{15}\text{NH}_4\text{Cl}$  (for B) or  $^{14}\text{NH}_4\text{Cl}$  (for C) with the 3 alleviation treatments for 1 hour (the detailed experimental information is provided in the Materials and Methods) before the root  $^{15}\text{N}$

content was measured. The data are the means  $\pm$  SDs; t-tests were used to identify significant differences, and different letters represent significant differences among different treatments ( $p < 0.05$ ).

**Fig 5. Correlation analysis revealed the correlations among phenotypic traits and physiological and biochemical data in rice roots.** The color of each cell at the row-column intersections indicates the correlation coefficient between different traits or data. The color scale on the right side shows the correlation coefficient from -1 (blue) to 1 (red).

**Fig 6. Study on this synergism using transcriptome analysis of the differentially expressed genes (DEGs).** “LFC” represents  $|\log_2FC|$ . (A) Numbers of DEGs between different treatments and the control ( $H_2O$ ). (B) Venn diagram showing alleviation-related gene numbers in each alleviation treatment. The expression of these genes was differentially regulated by  $NH_4^+$  toxicity and recovered to the control level by the 3 alleviation treatments.

**Fig 7. Study on this synergism using WGCNA.** (A) Hierarchical cluster tree showing coexpression modules identified by WGCNA. Each leaf in the tree represents one gene. The major tree branch comprises 15 modules labeled by different colors. (B) Venn diagram showing the interactions of genes in root-trait coupled modules and DEGs whose expression was recovered only by  $KNO_3$  under  $NH_4^+$  toxicity. (C) Module-trait association. Each row corresponds to a module. Each column corresponds to a trait.

The color of each cell at the row-column intersection indicates the correlation coefficient from -1 (green) to 1 (red).

**Fig 8. Construction of a cell wall regulation network related to this synergism. (A)**

A network involved in cell wall formation was constructed according to the literature (line) and predicted transcriptional regulation (dashed line). Blue boxes indicate genes or proteins; yellow ovals indicate chemicals; green boxes indicate biological processes.

(B) Expression patterns of genes in this network under different treatments.



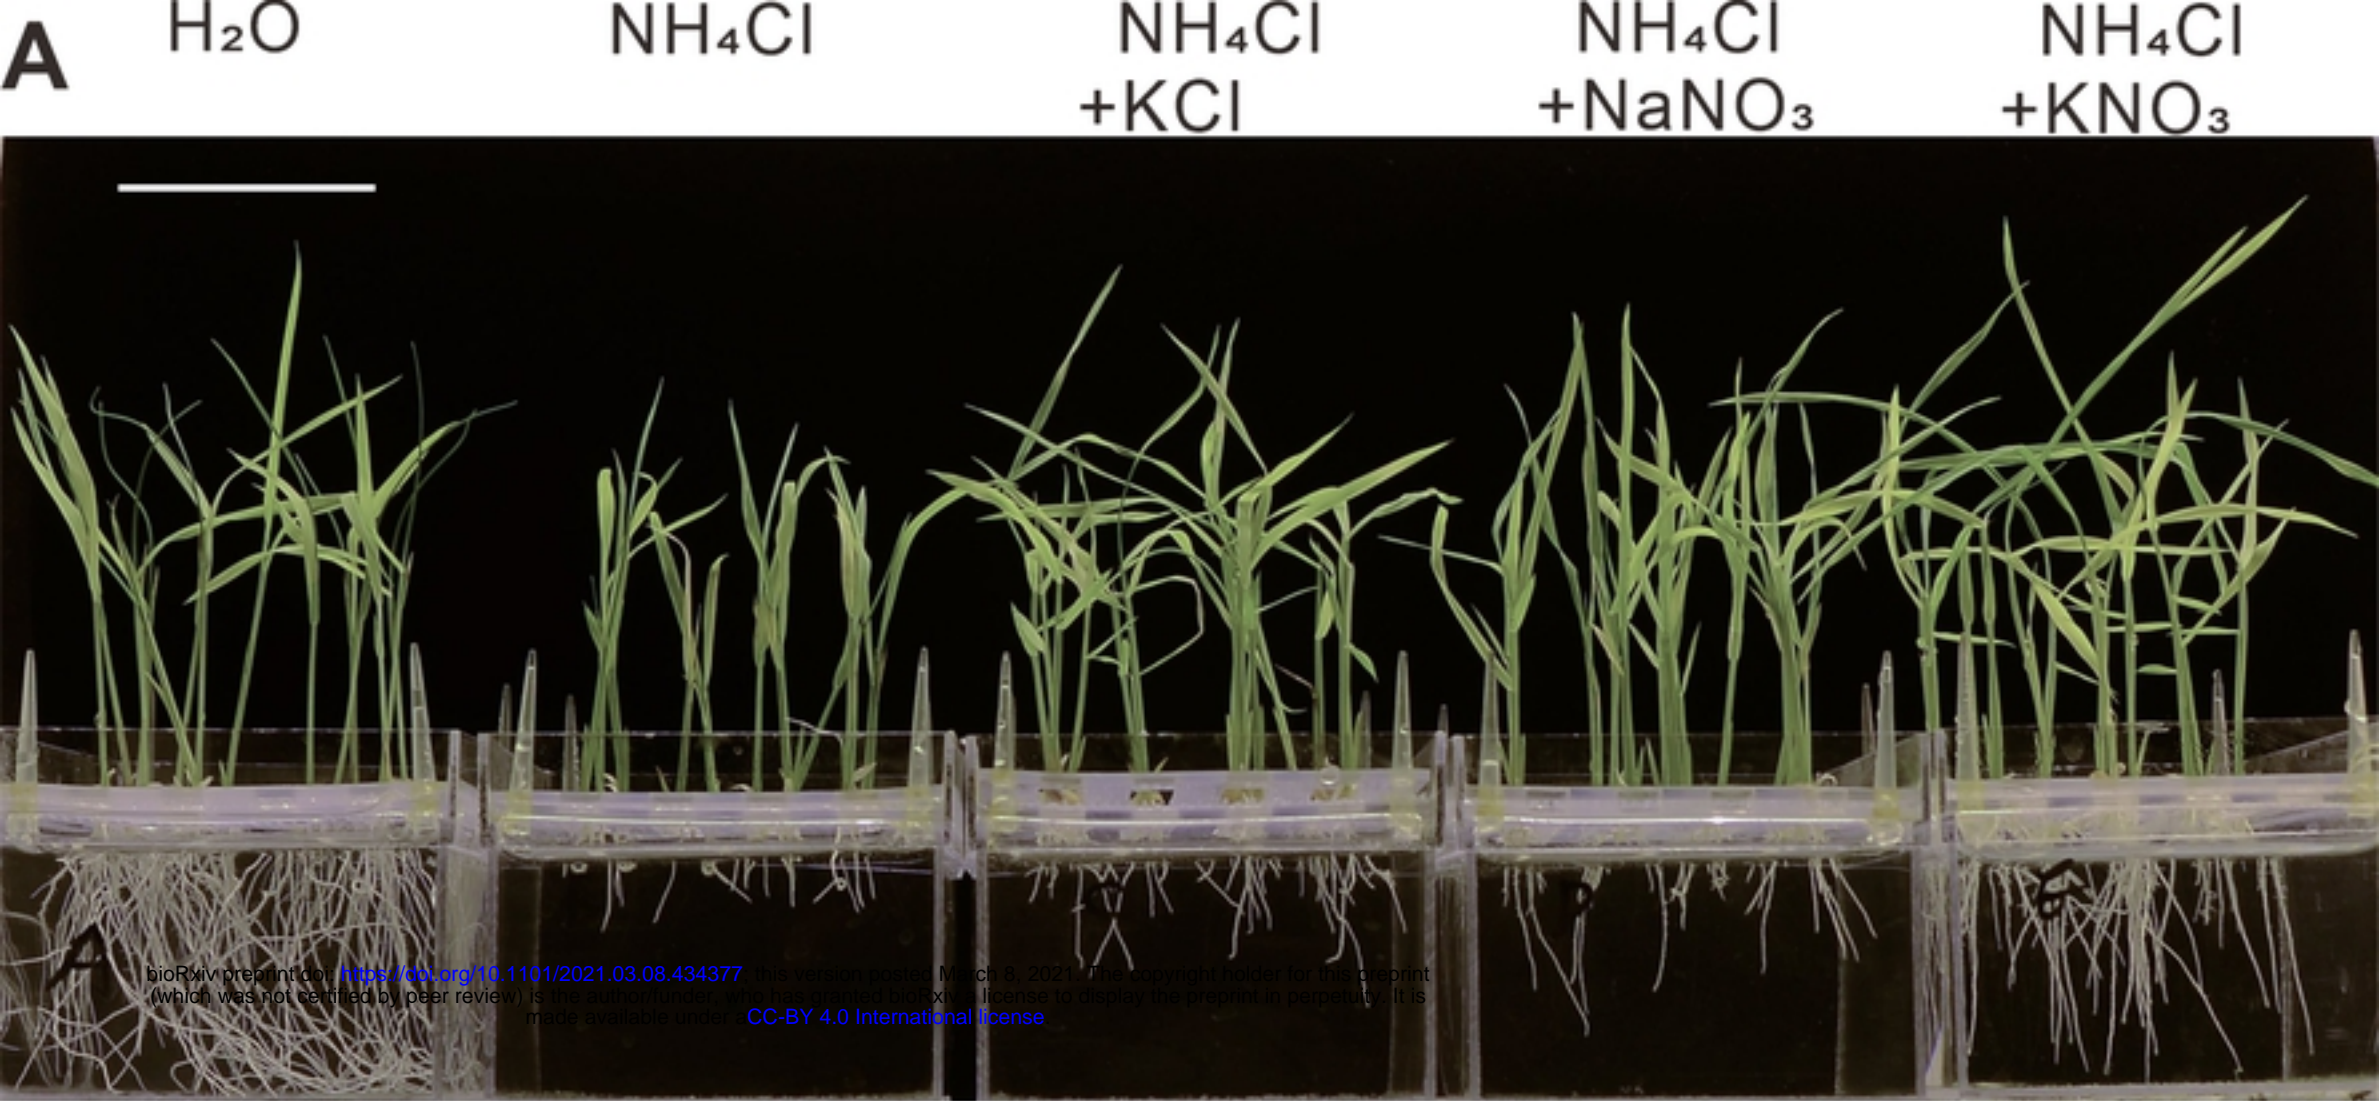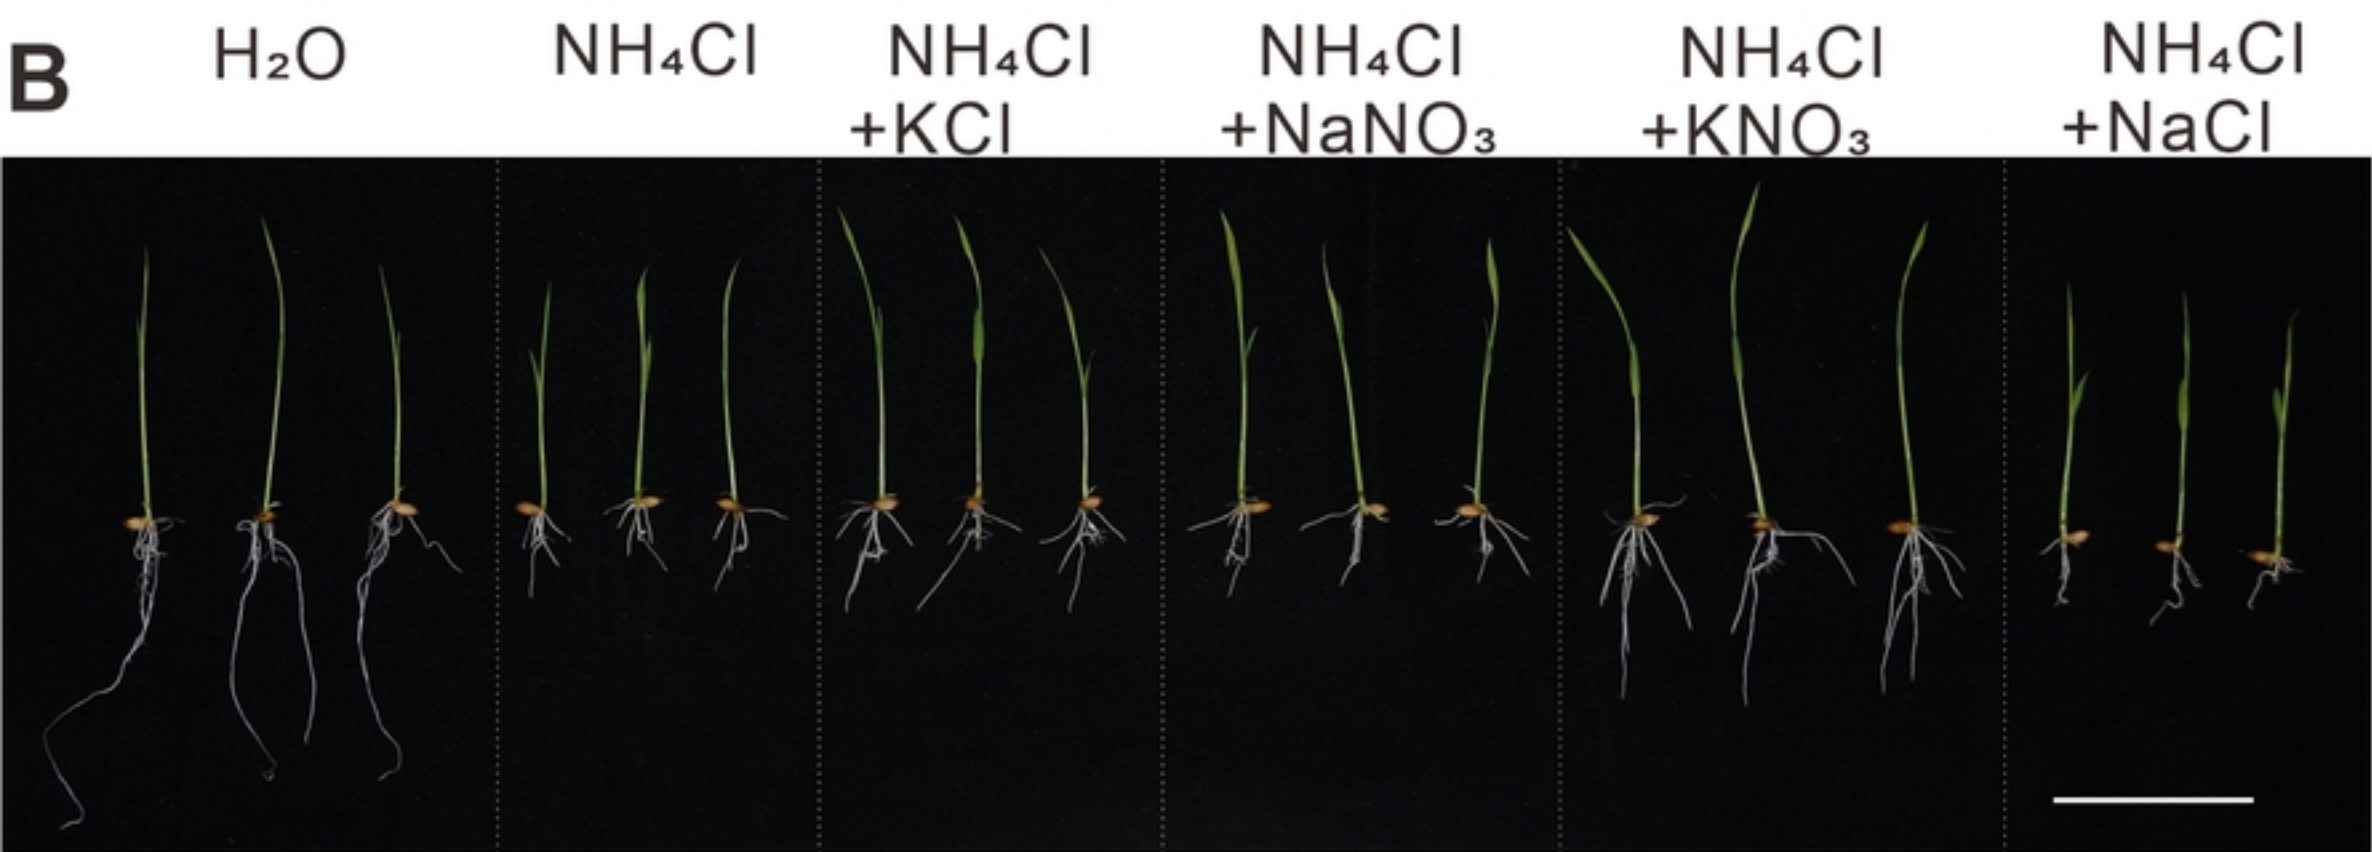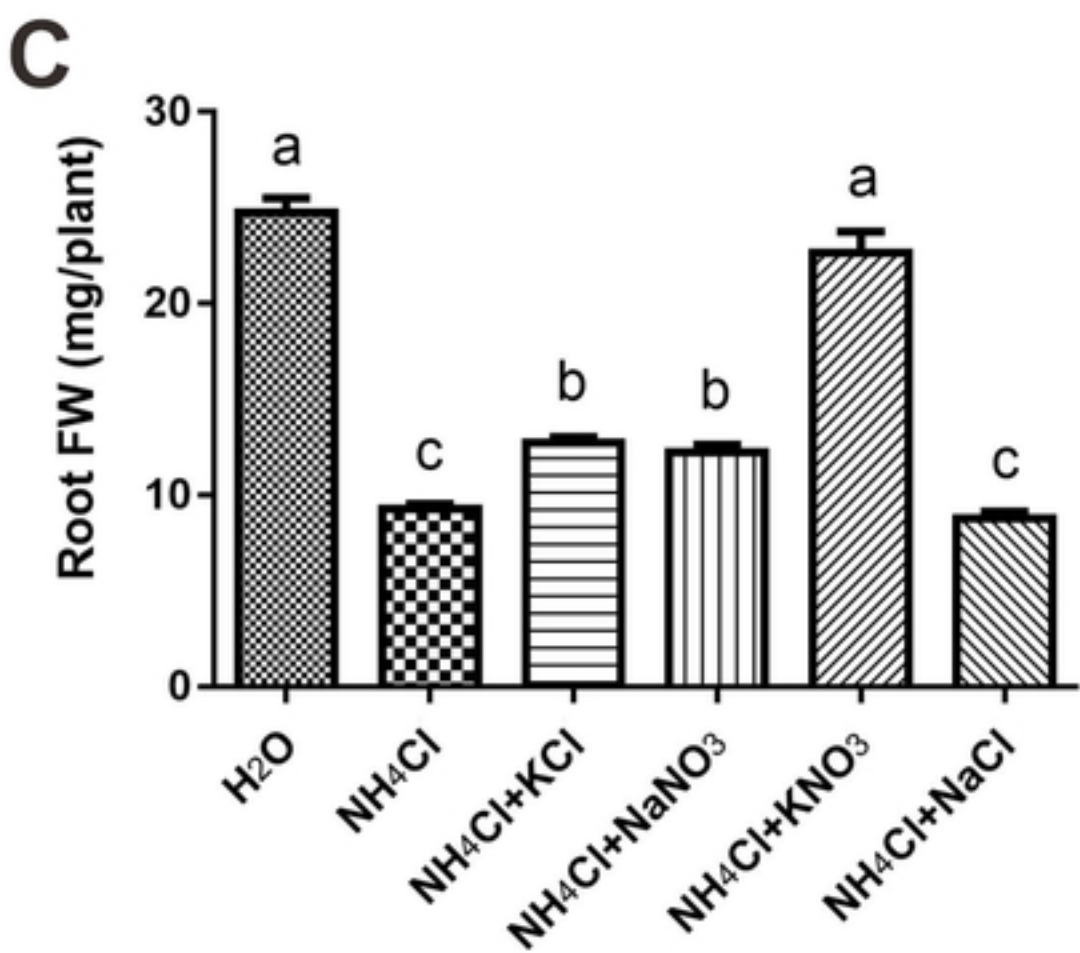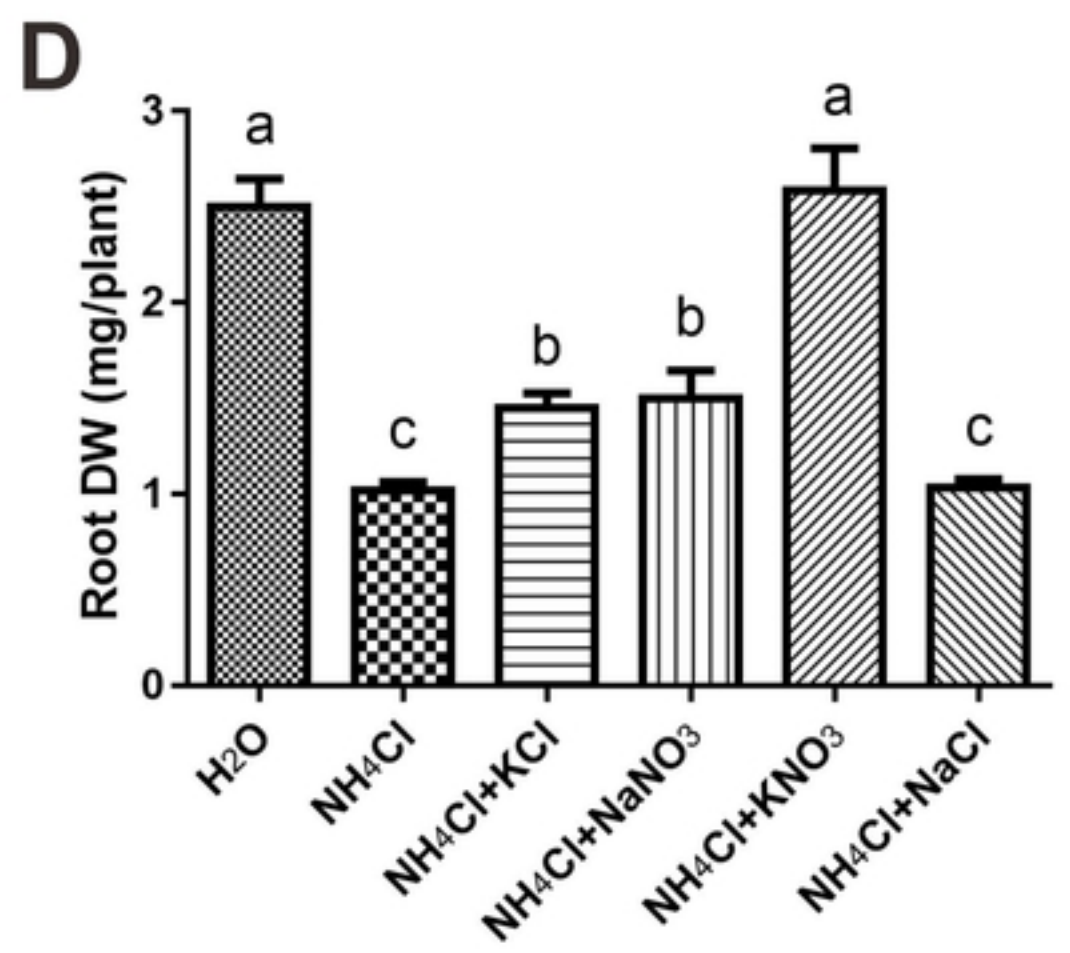

Figure 1

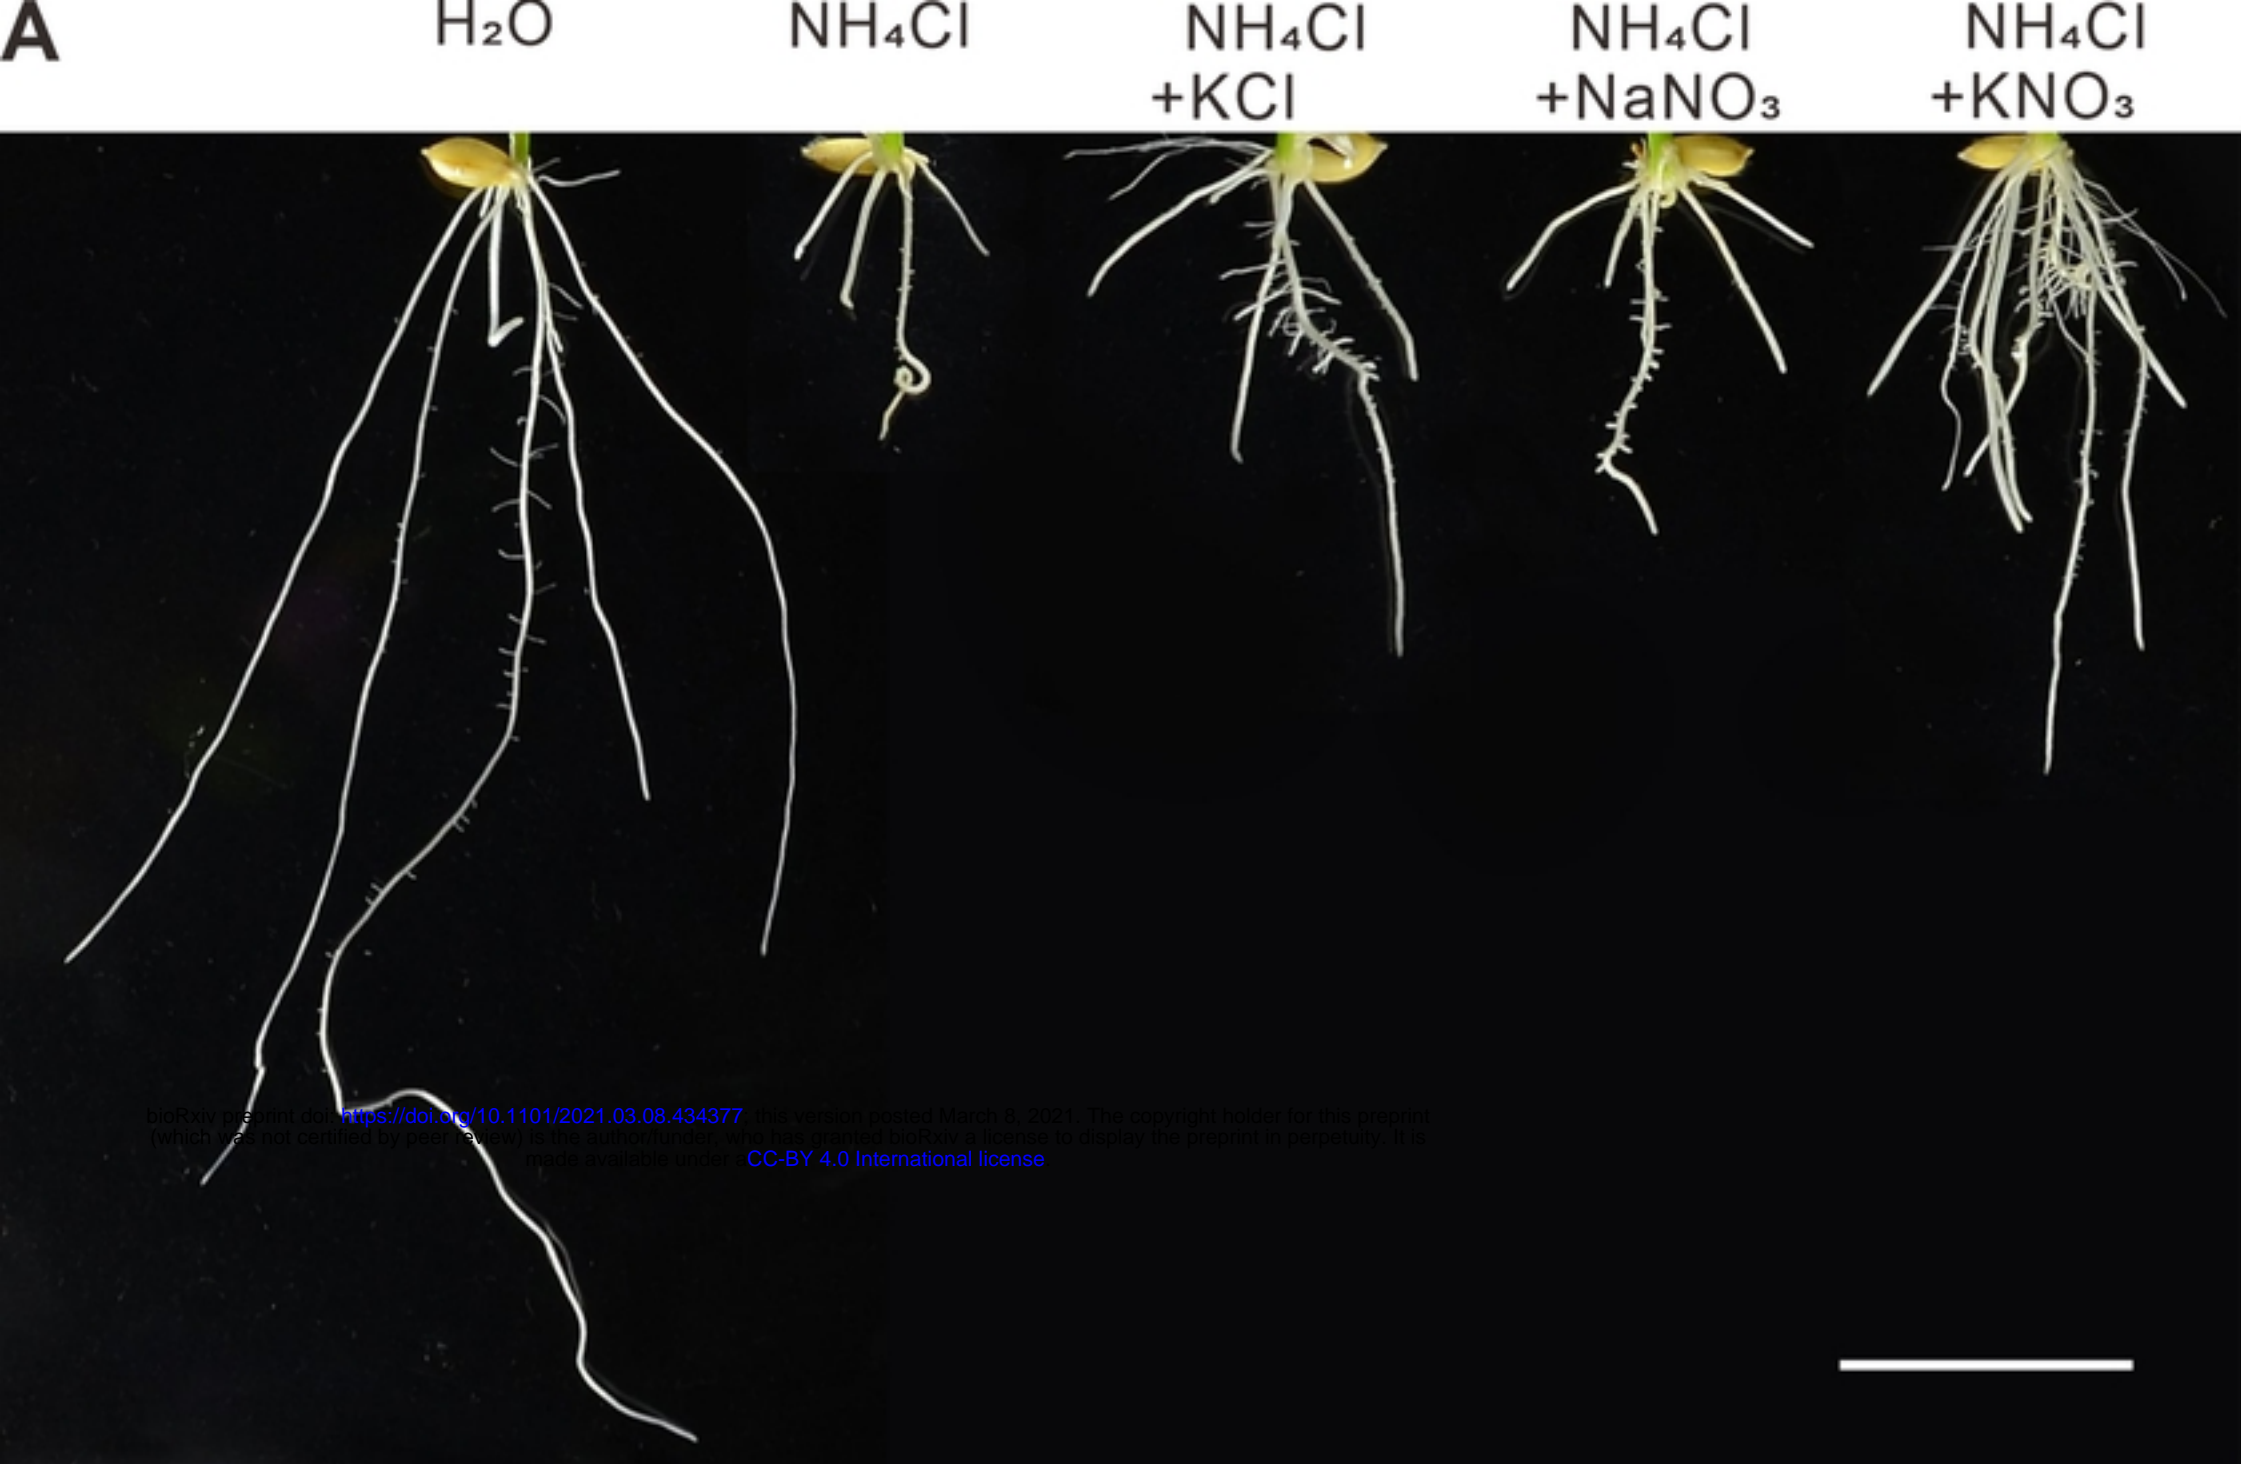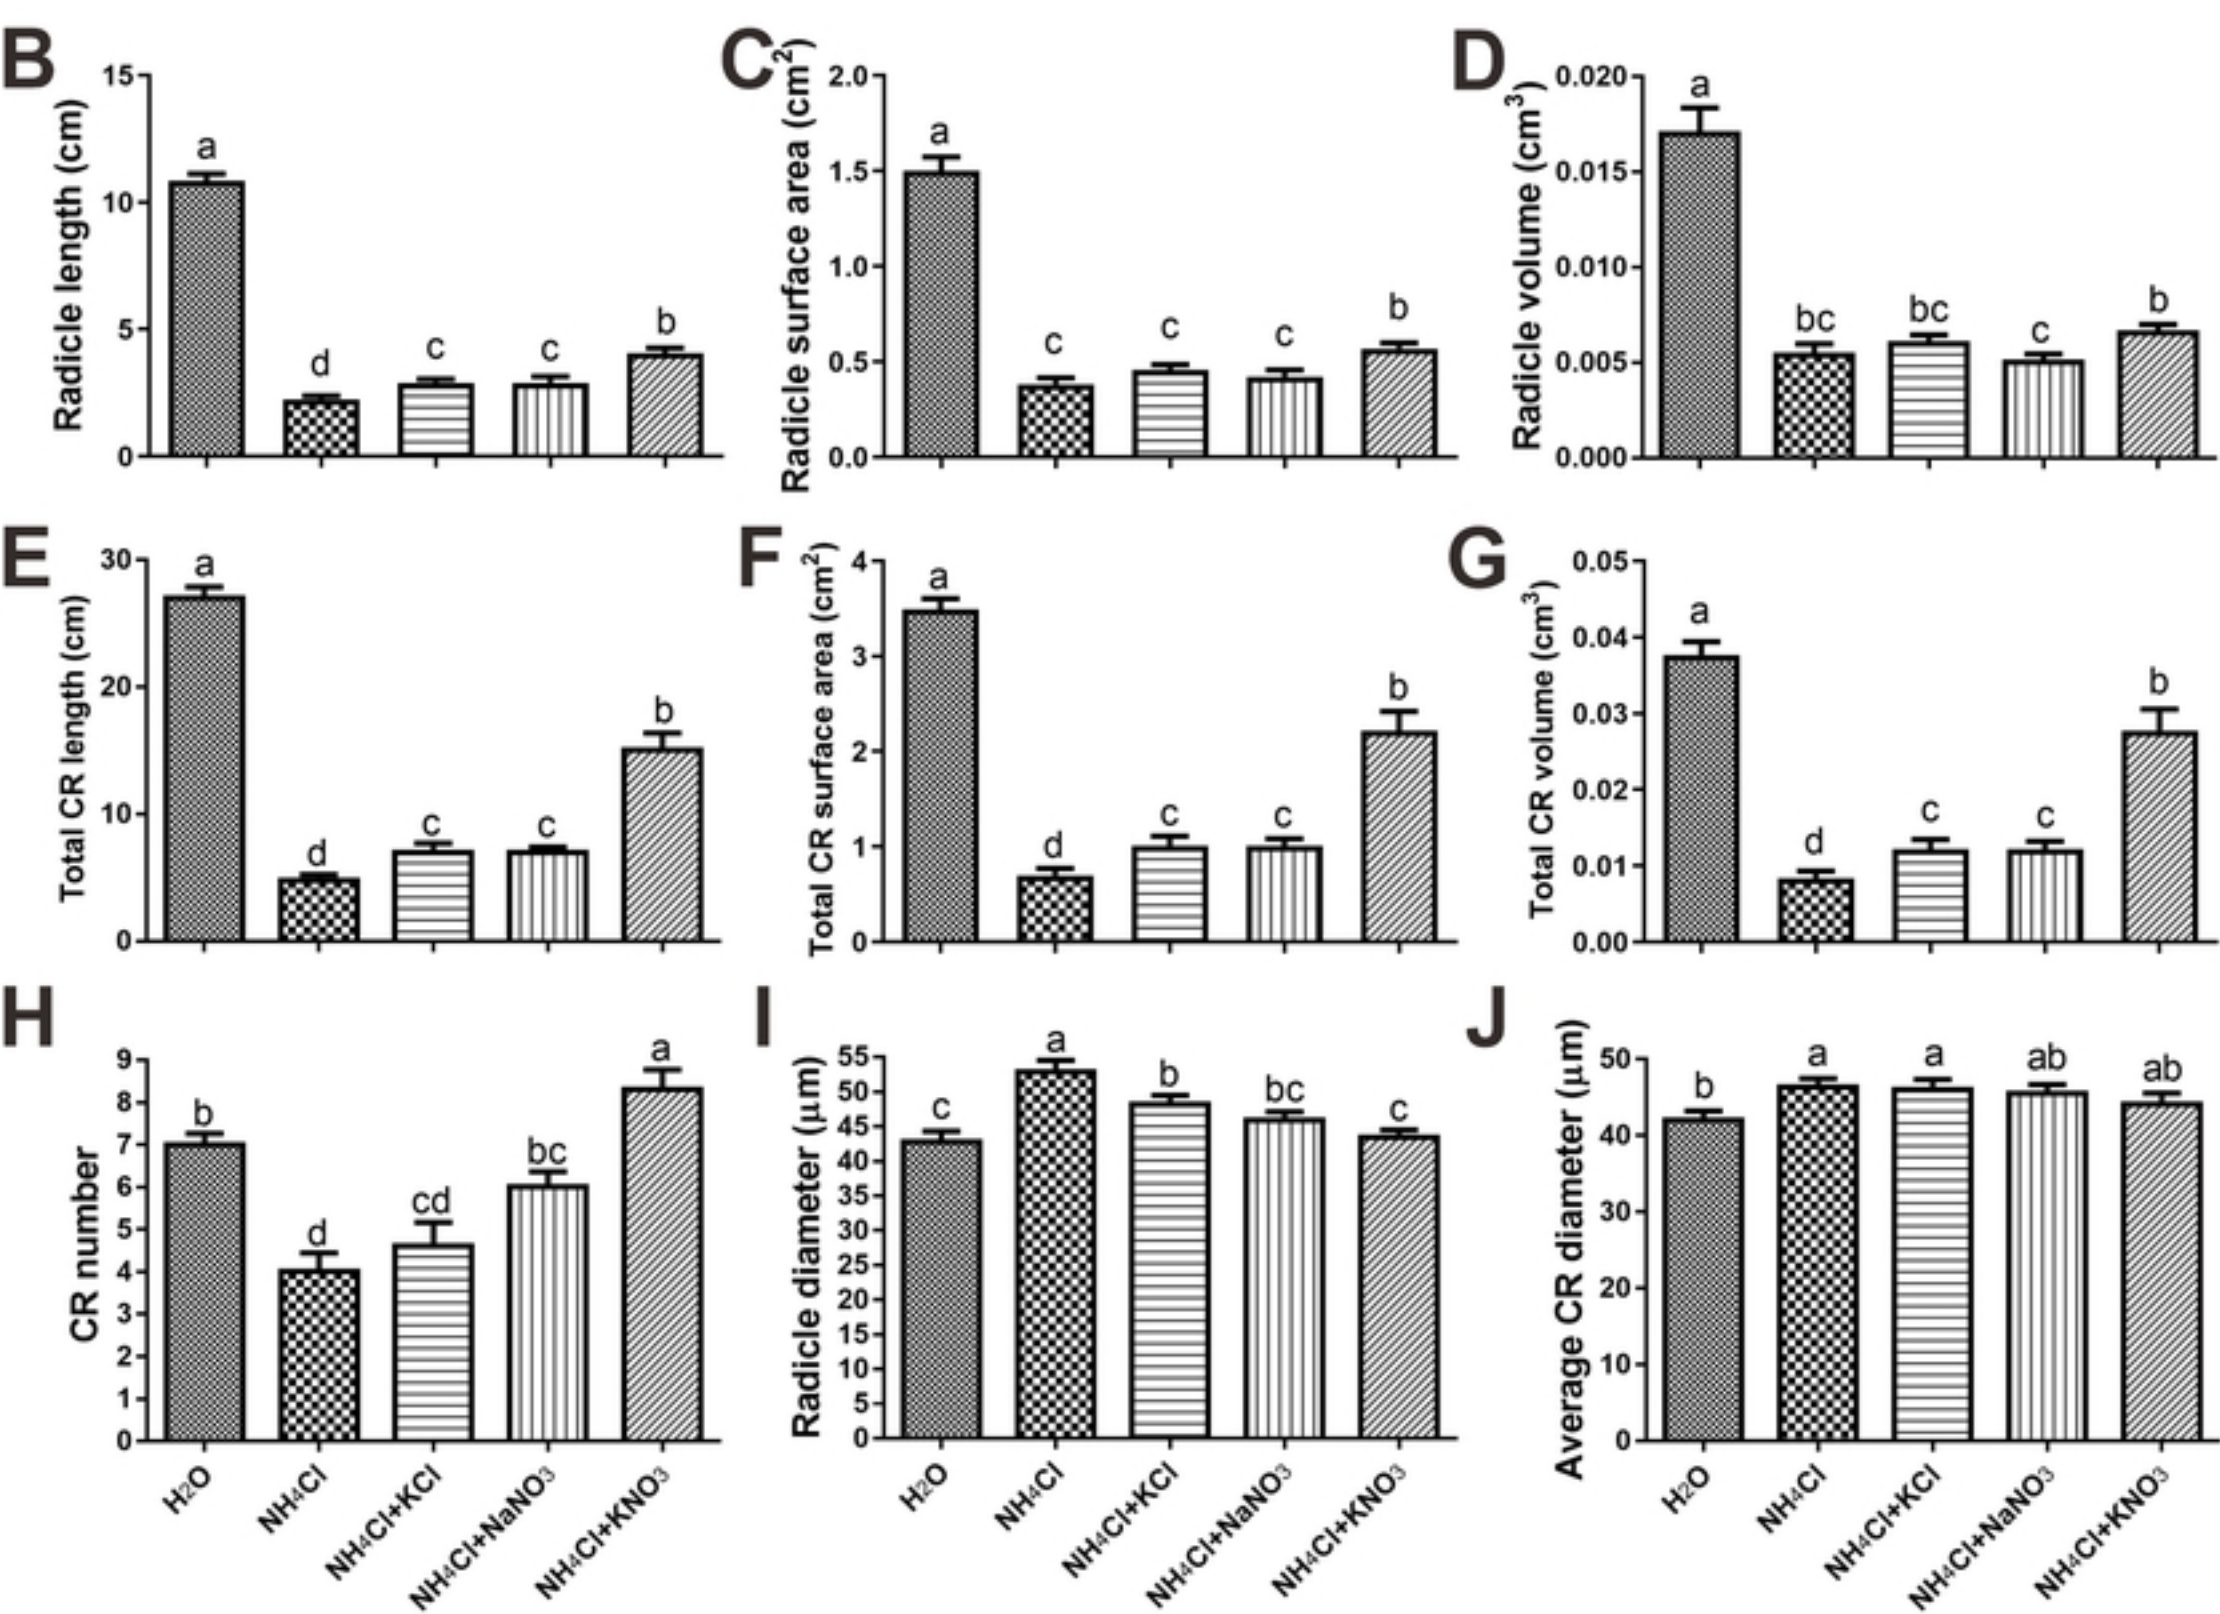

Figure 2

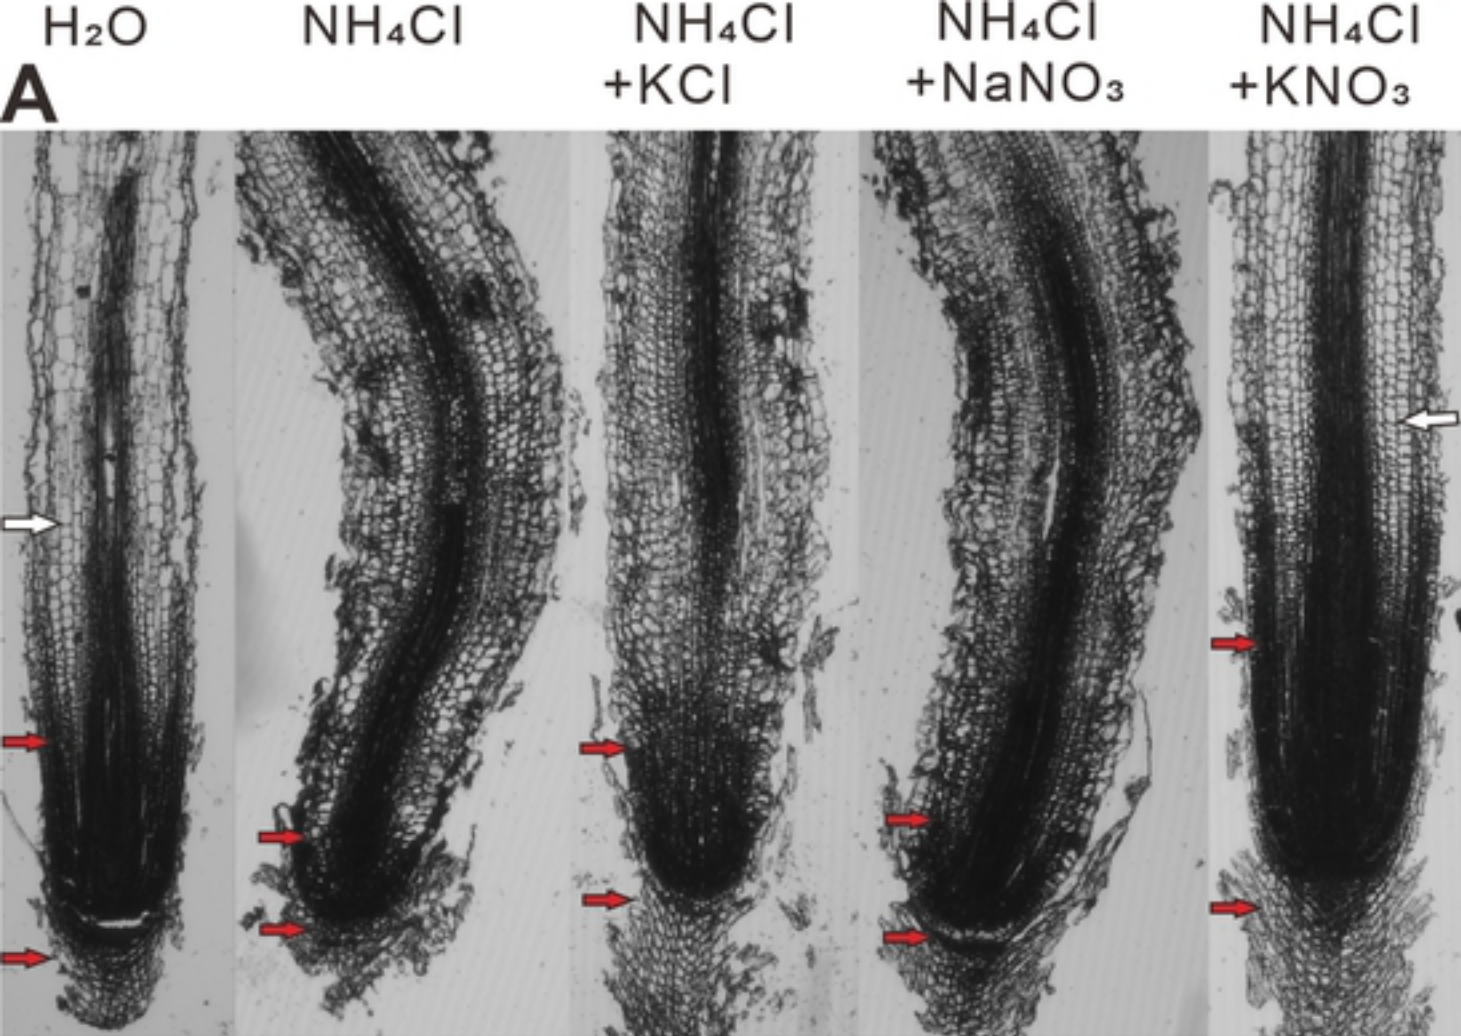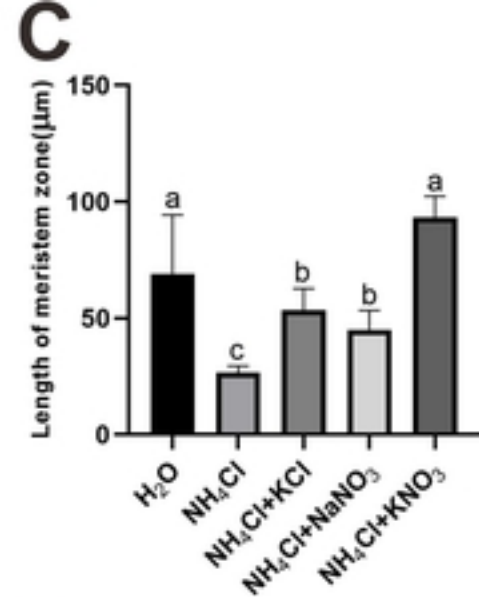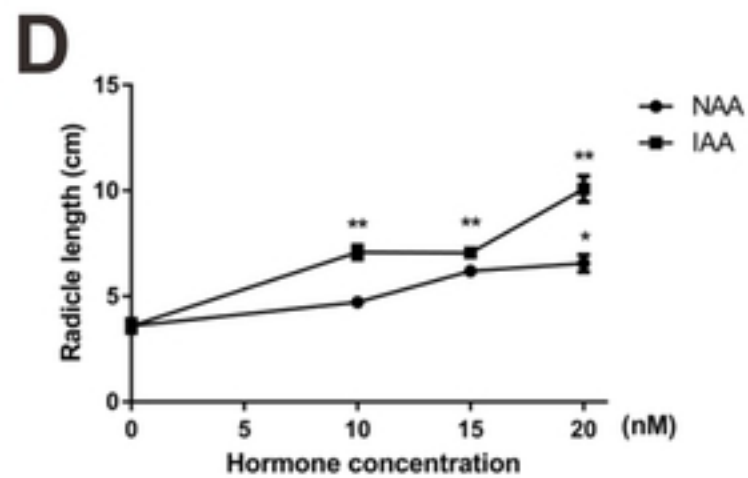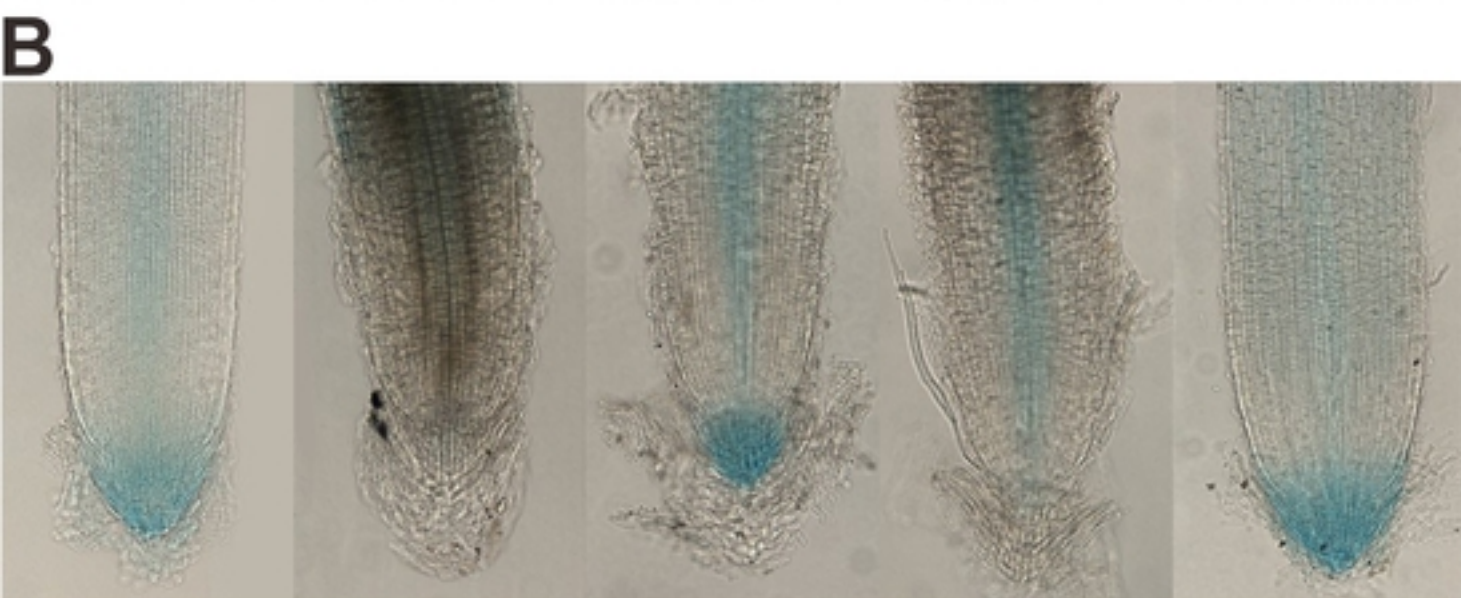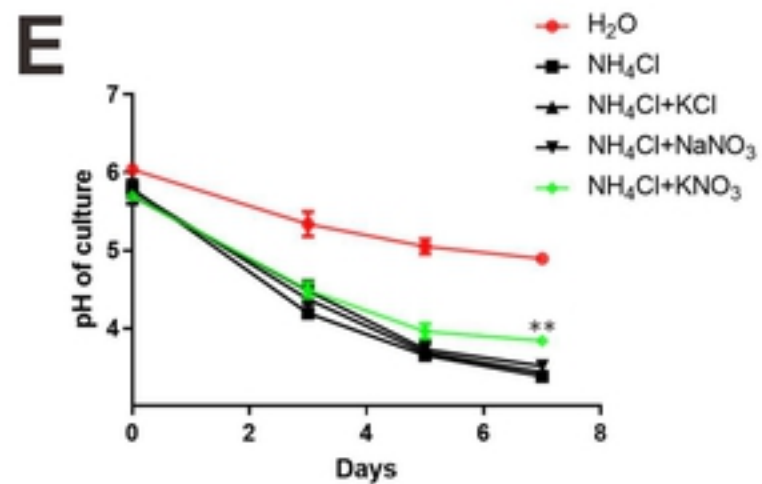

Figure 3

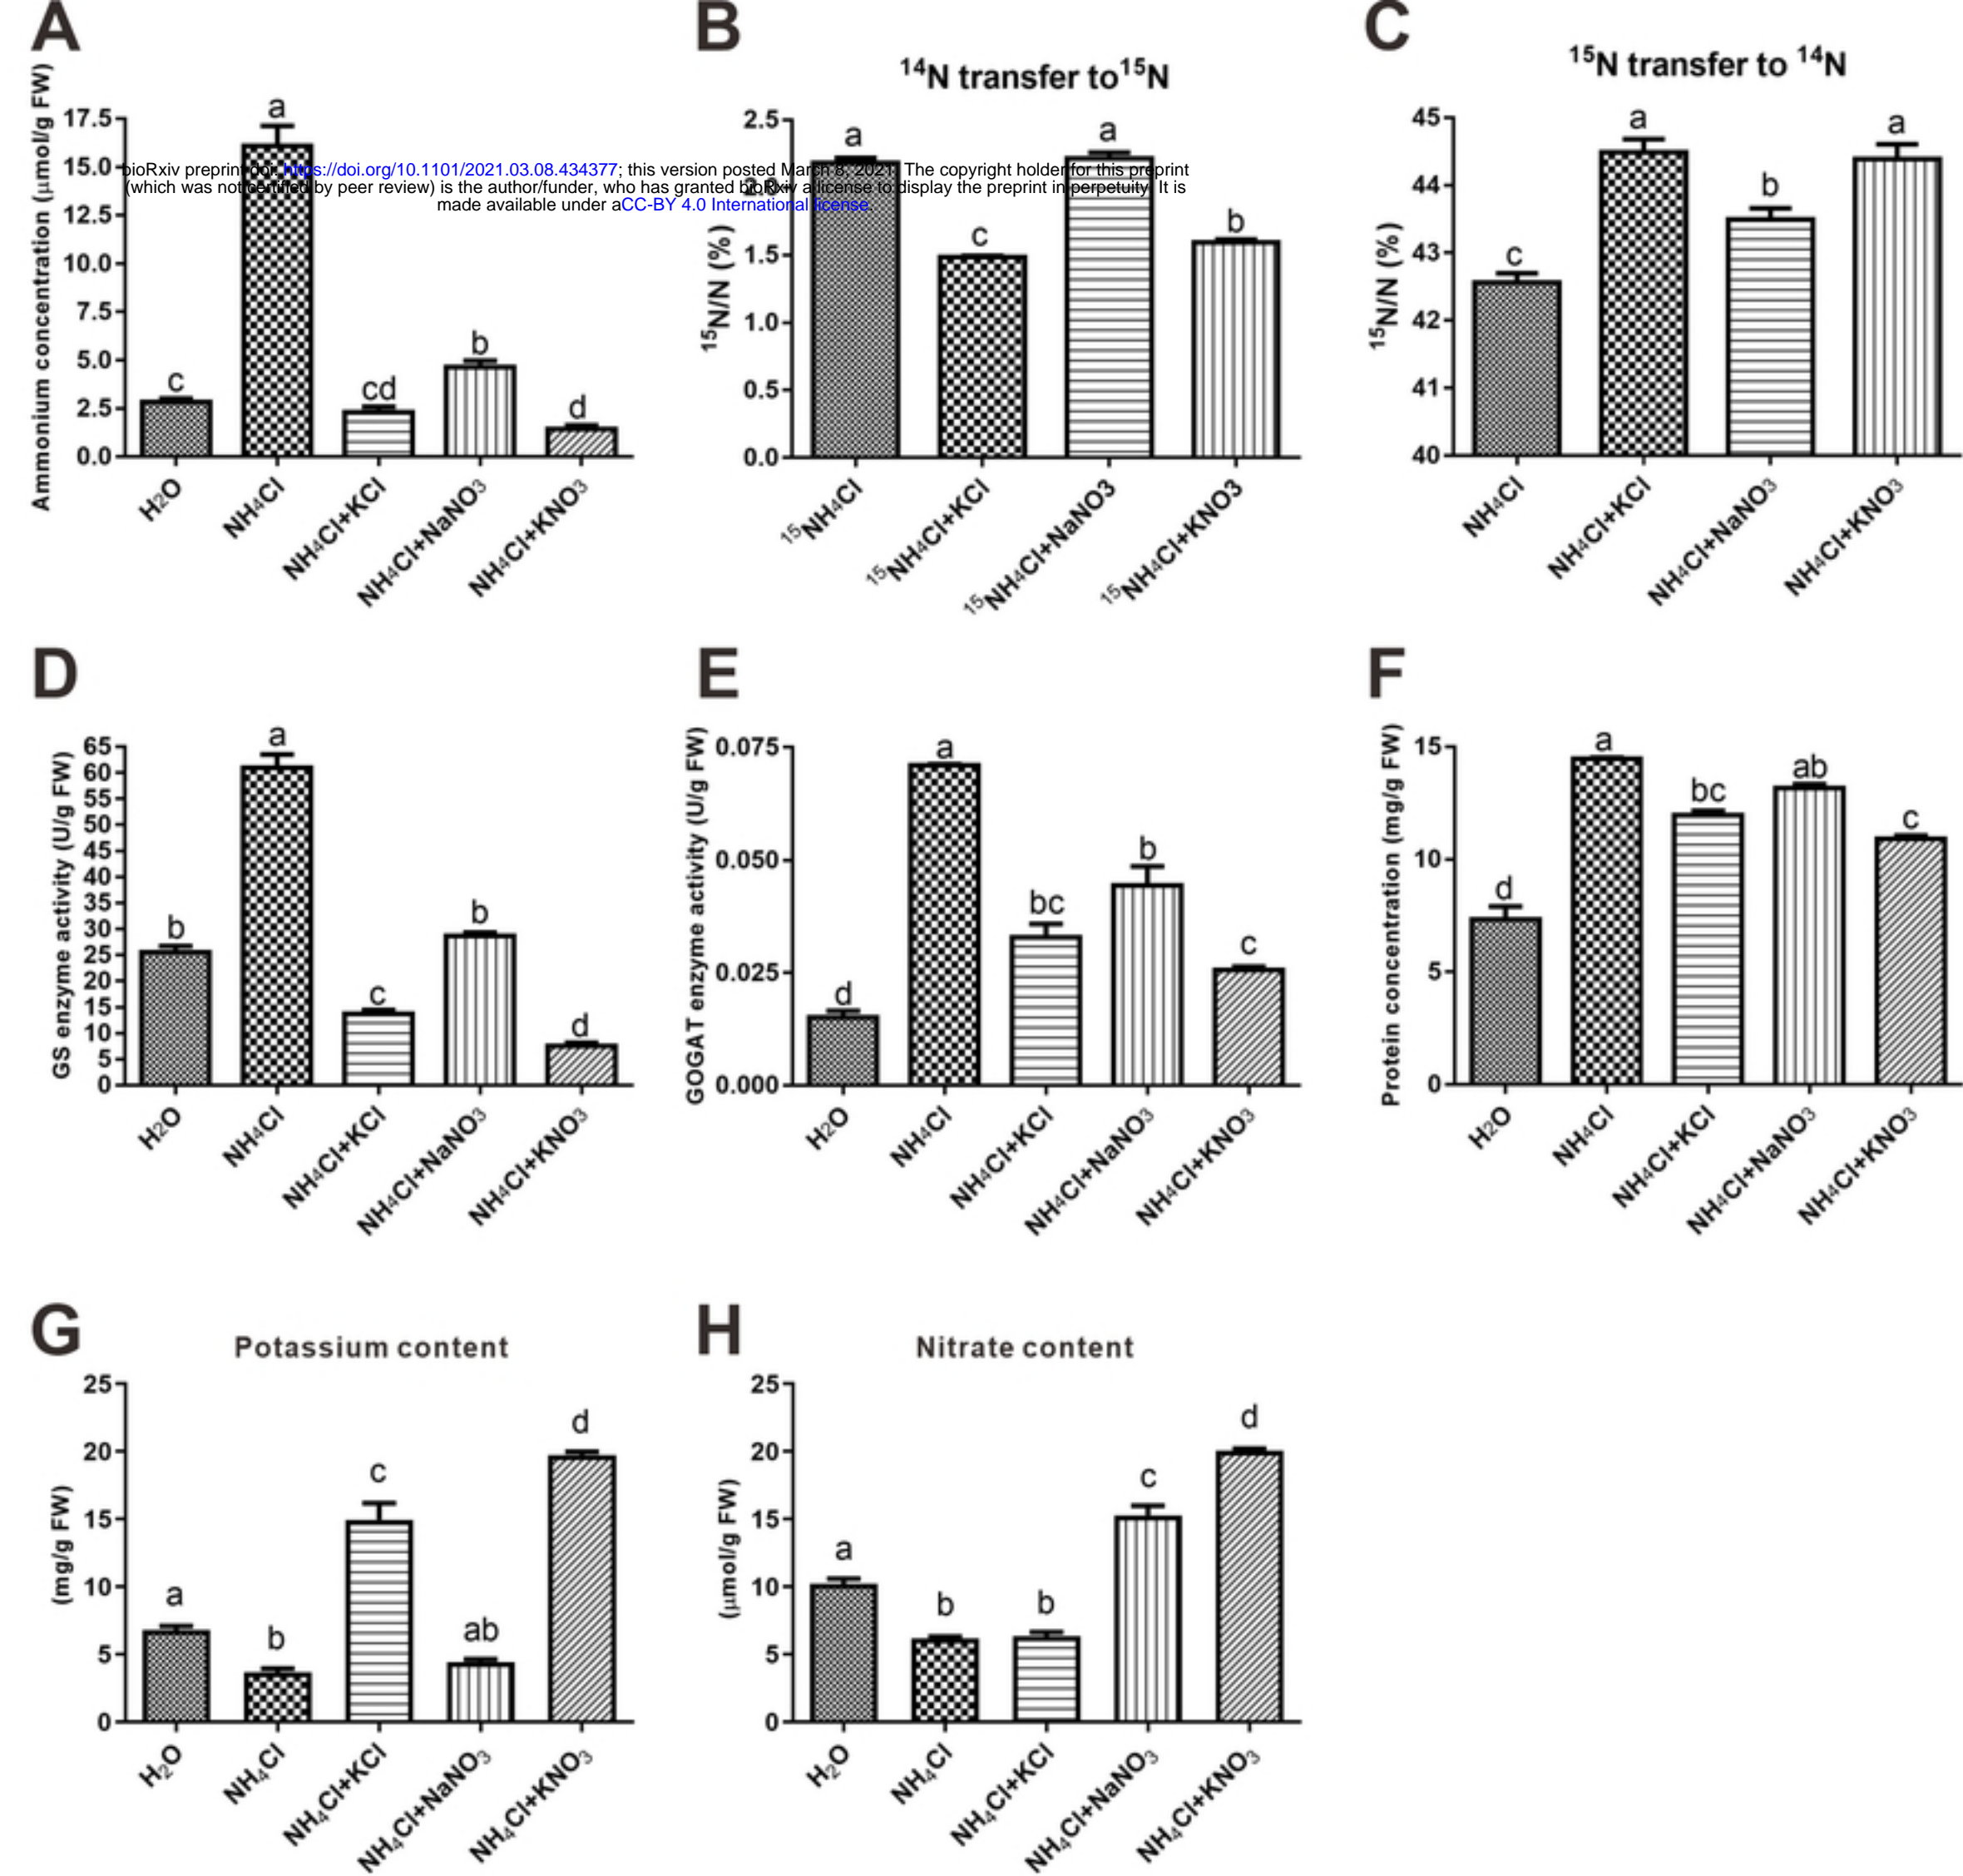

Figure 4

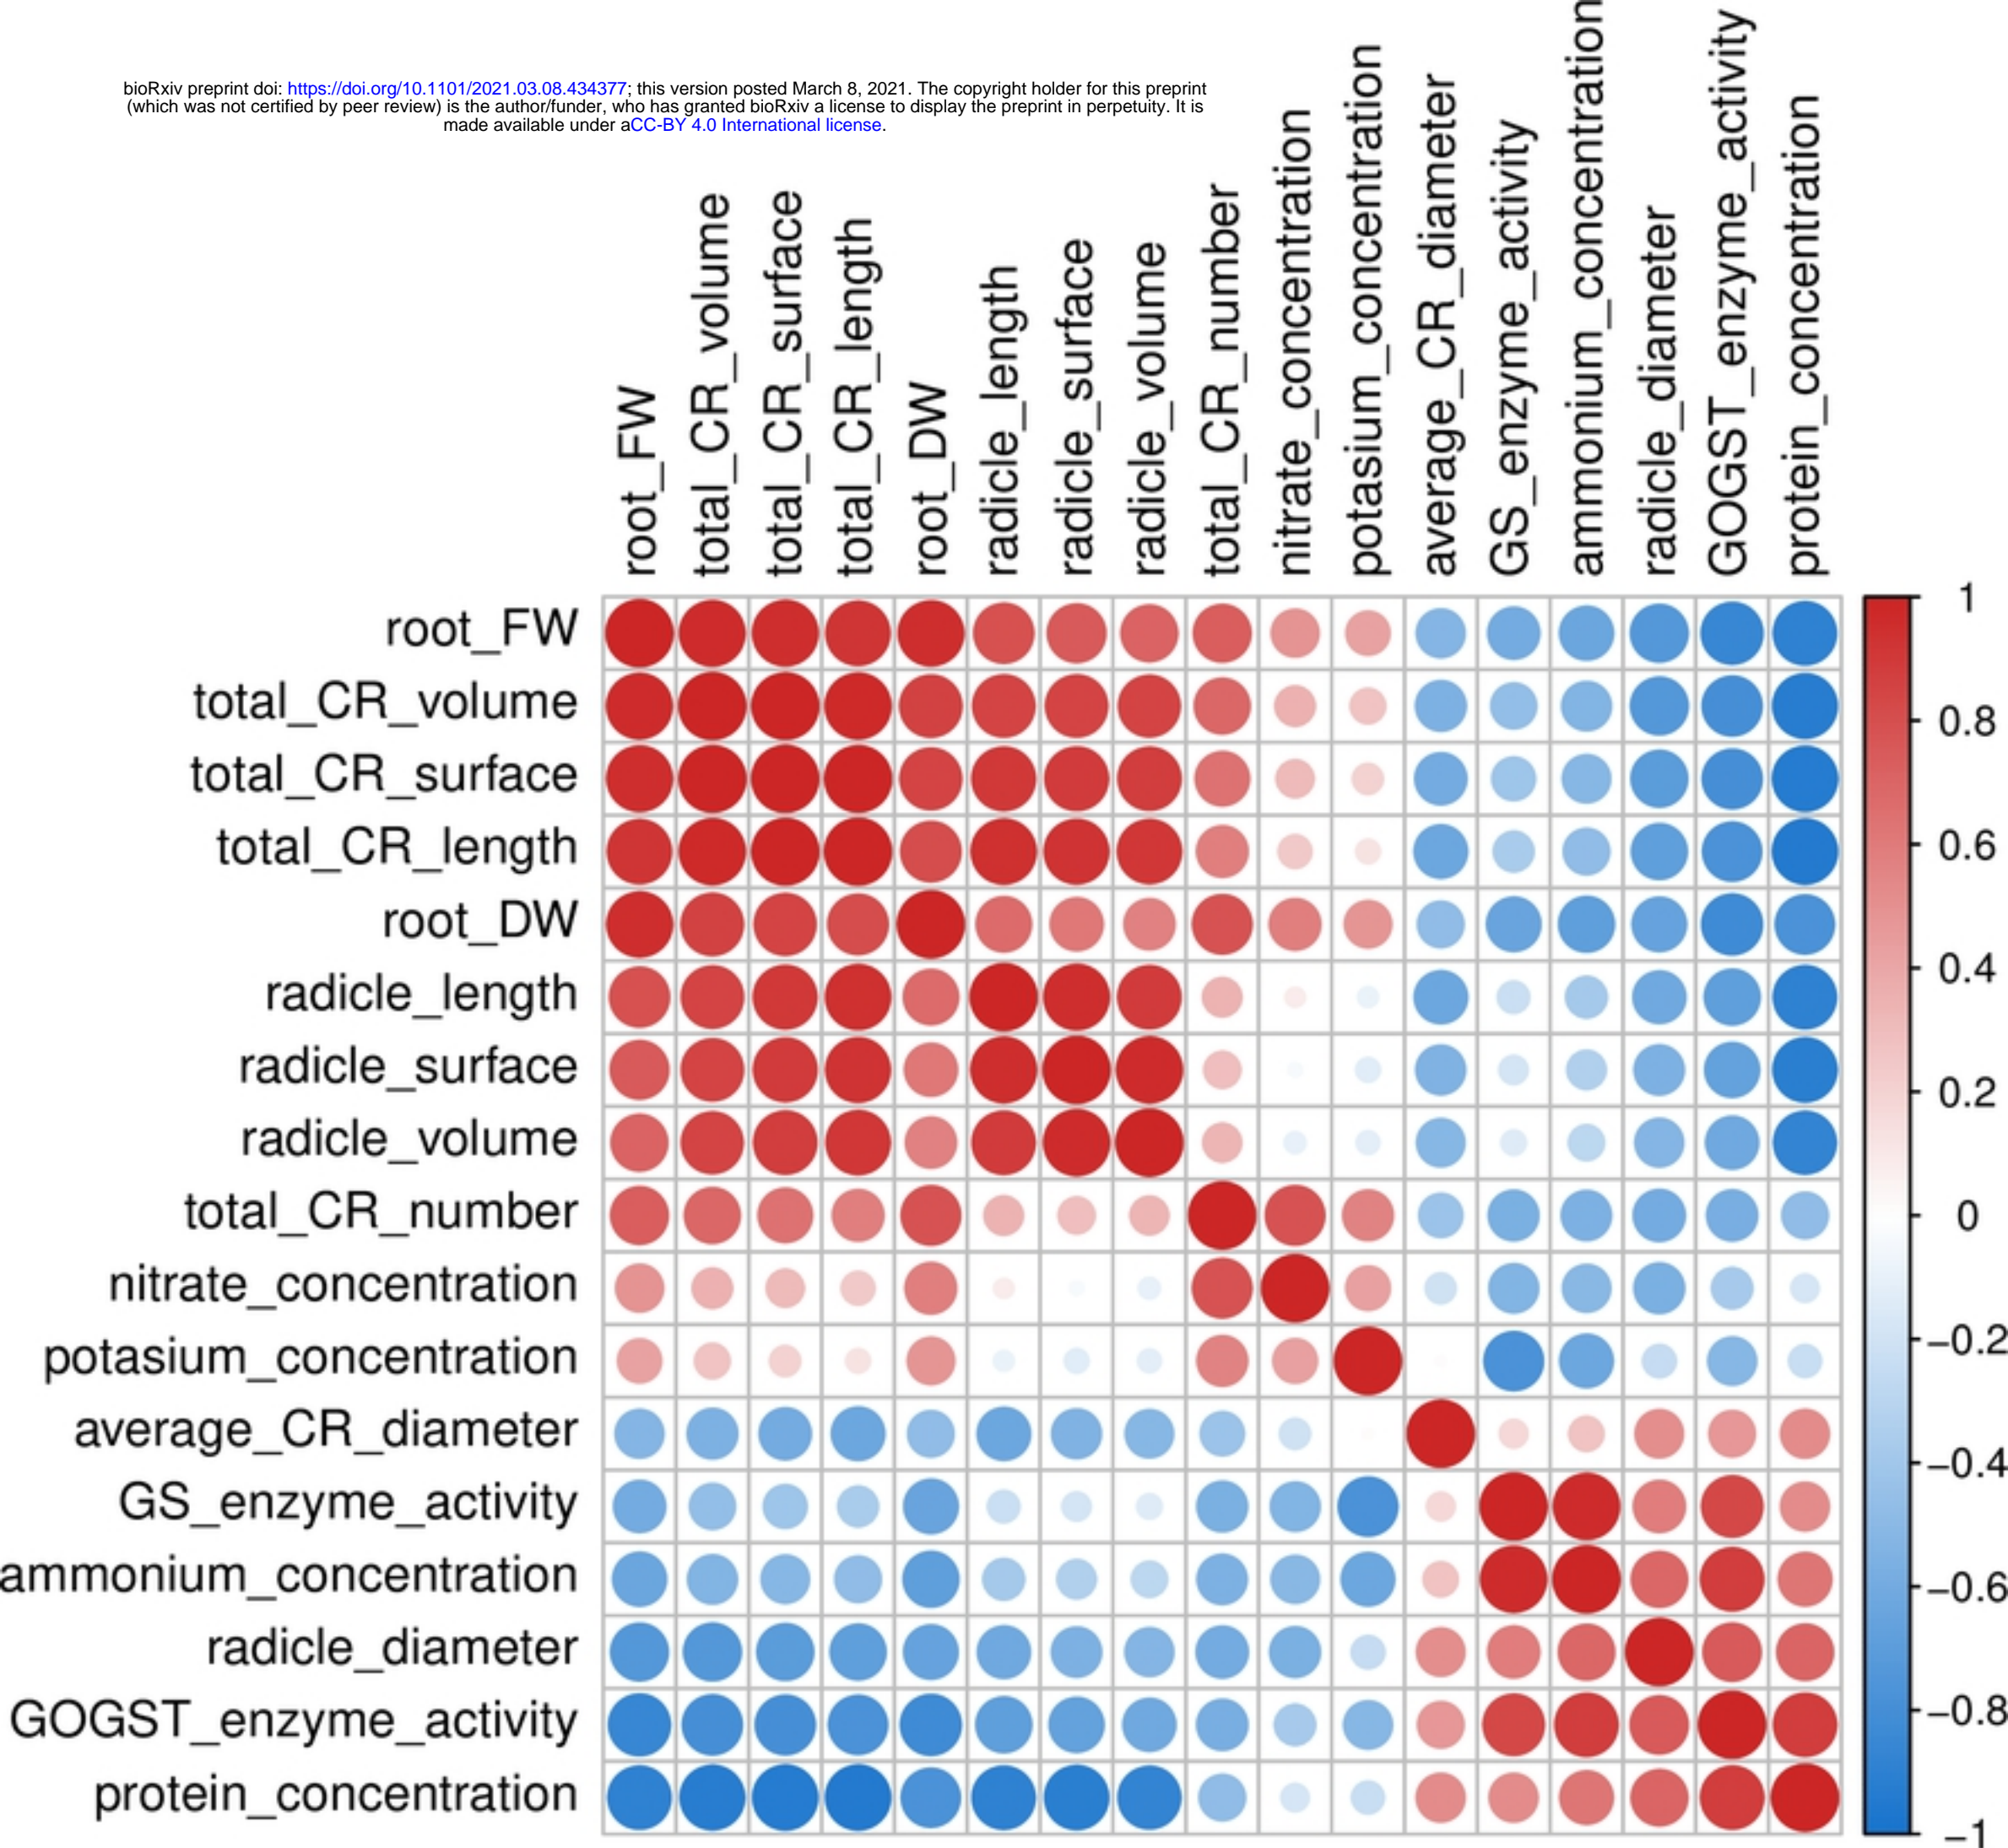

Figure 5

**A**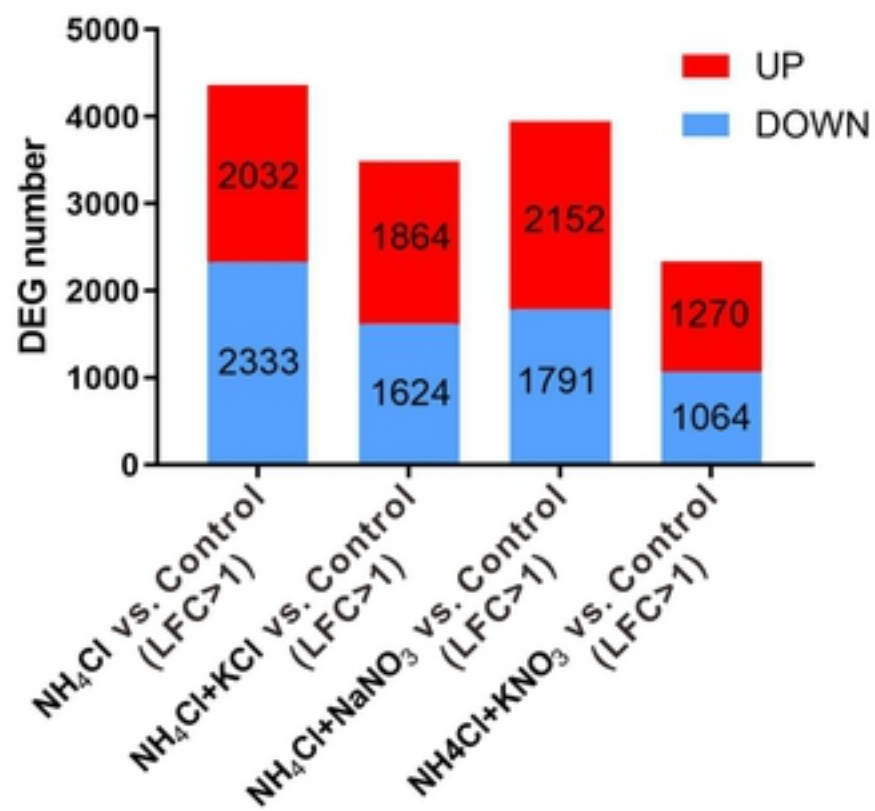**B**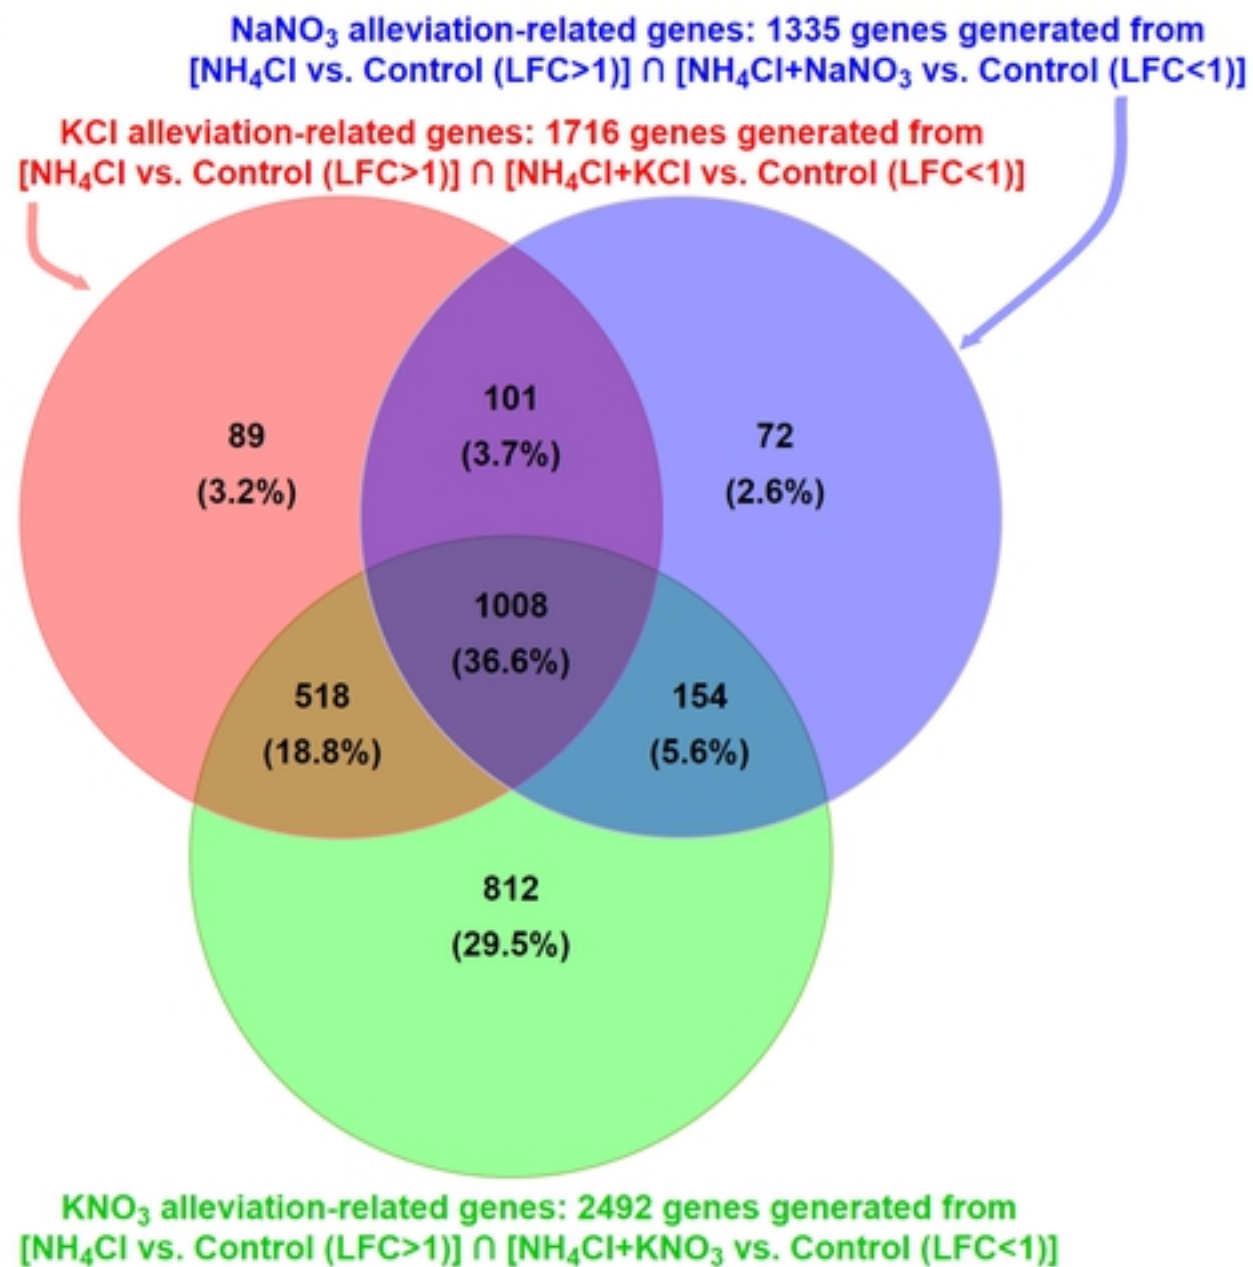

Figure 6

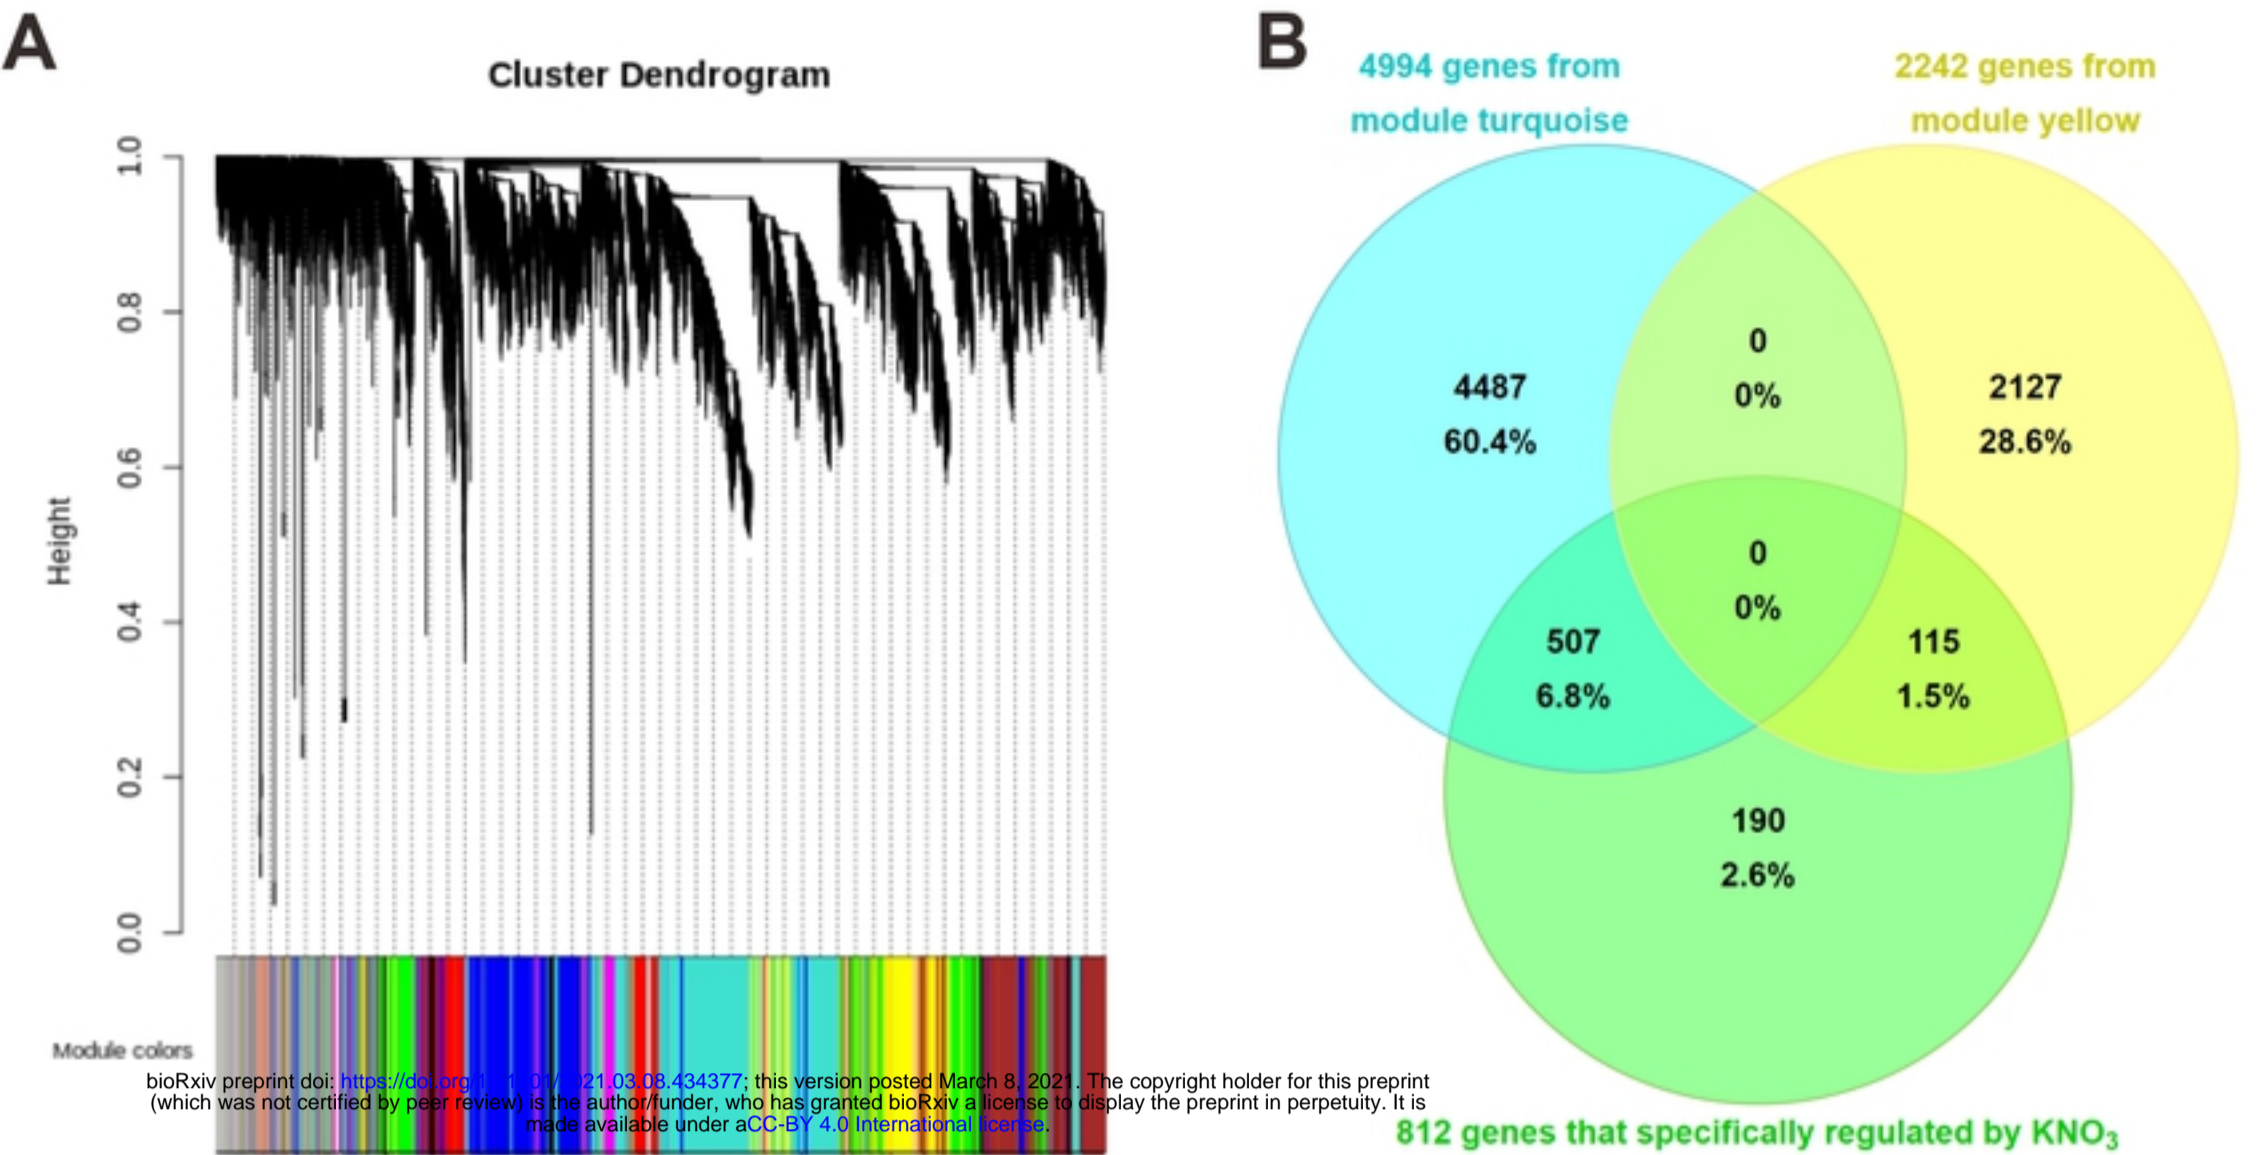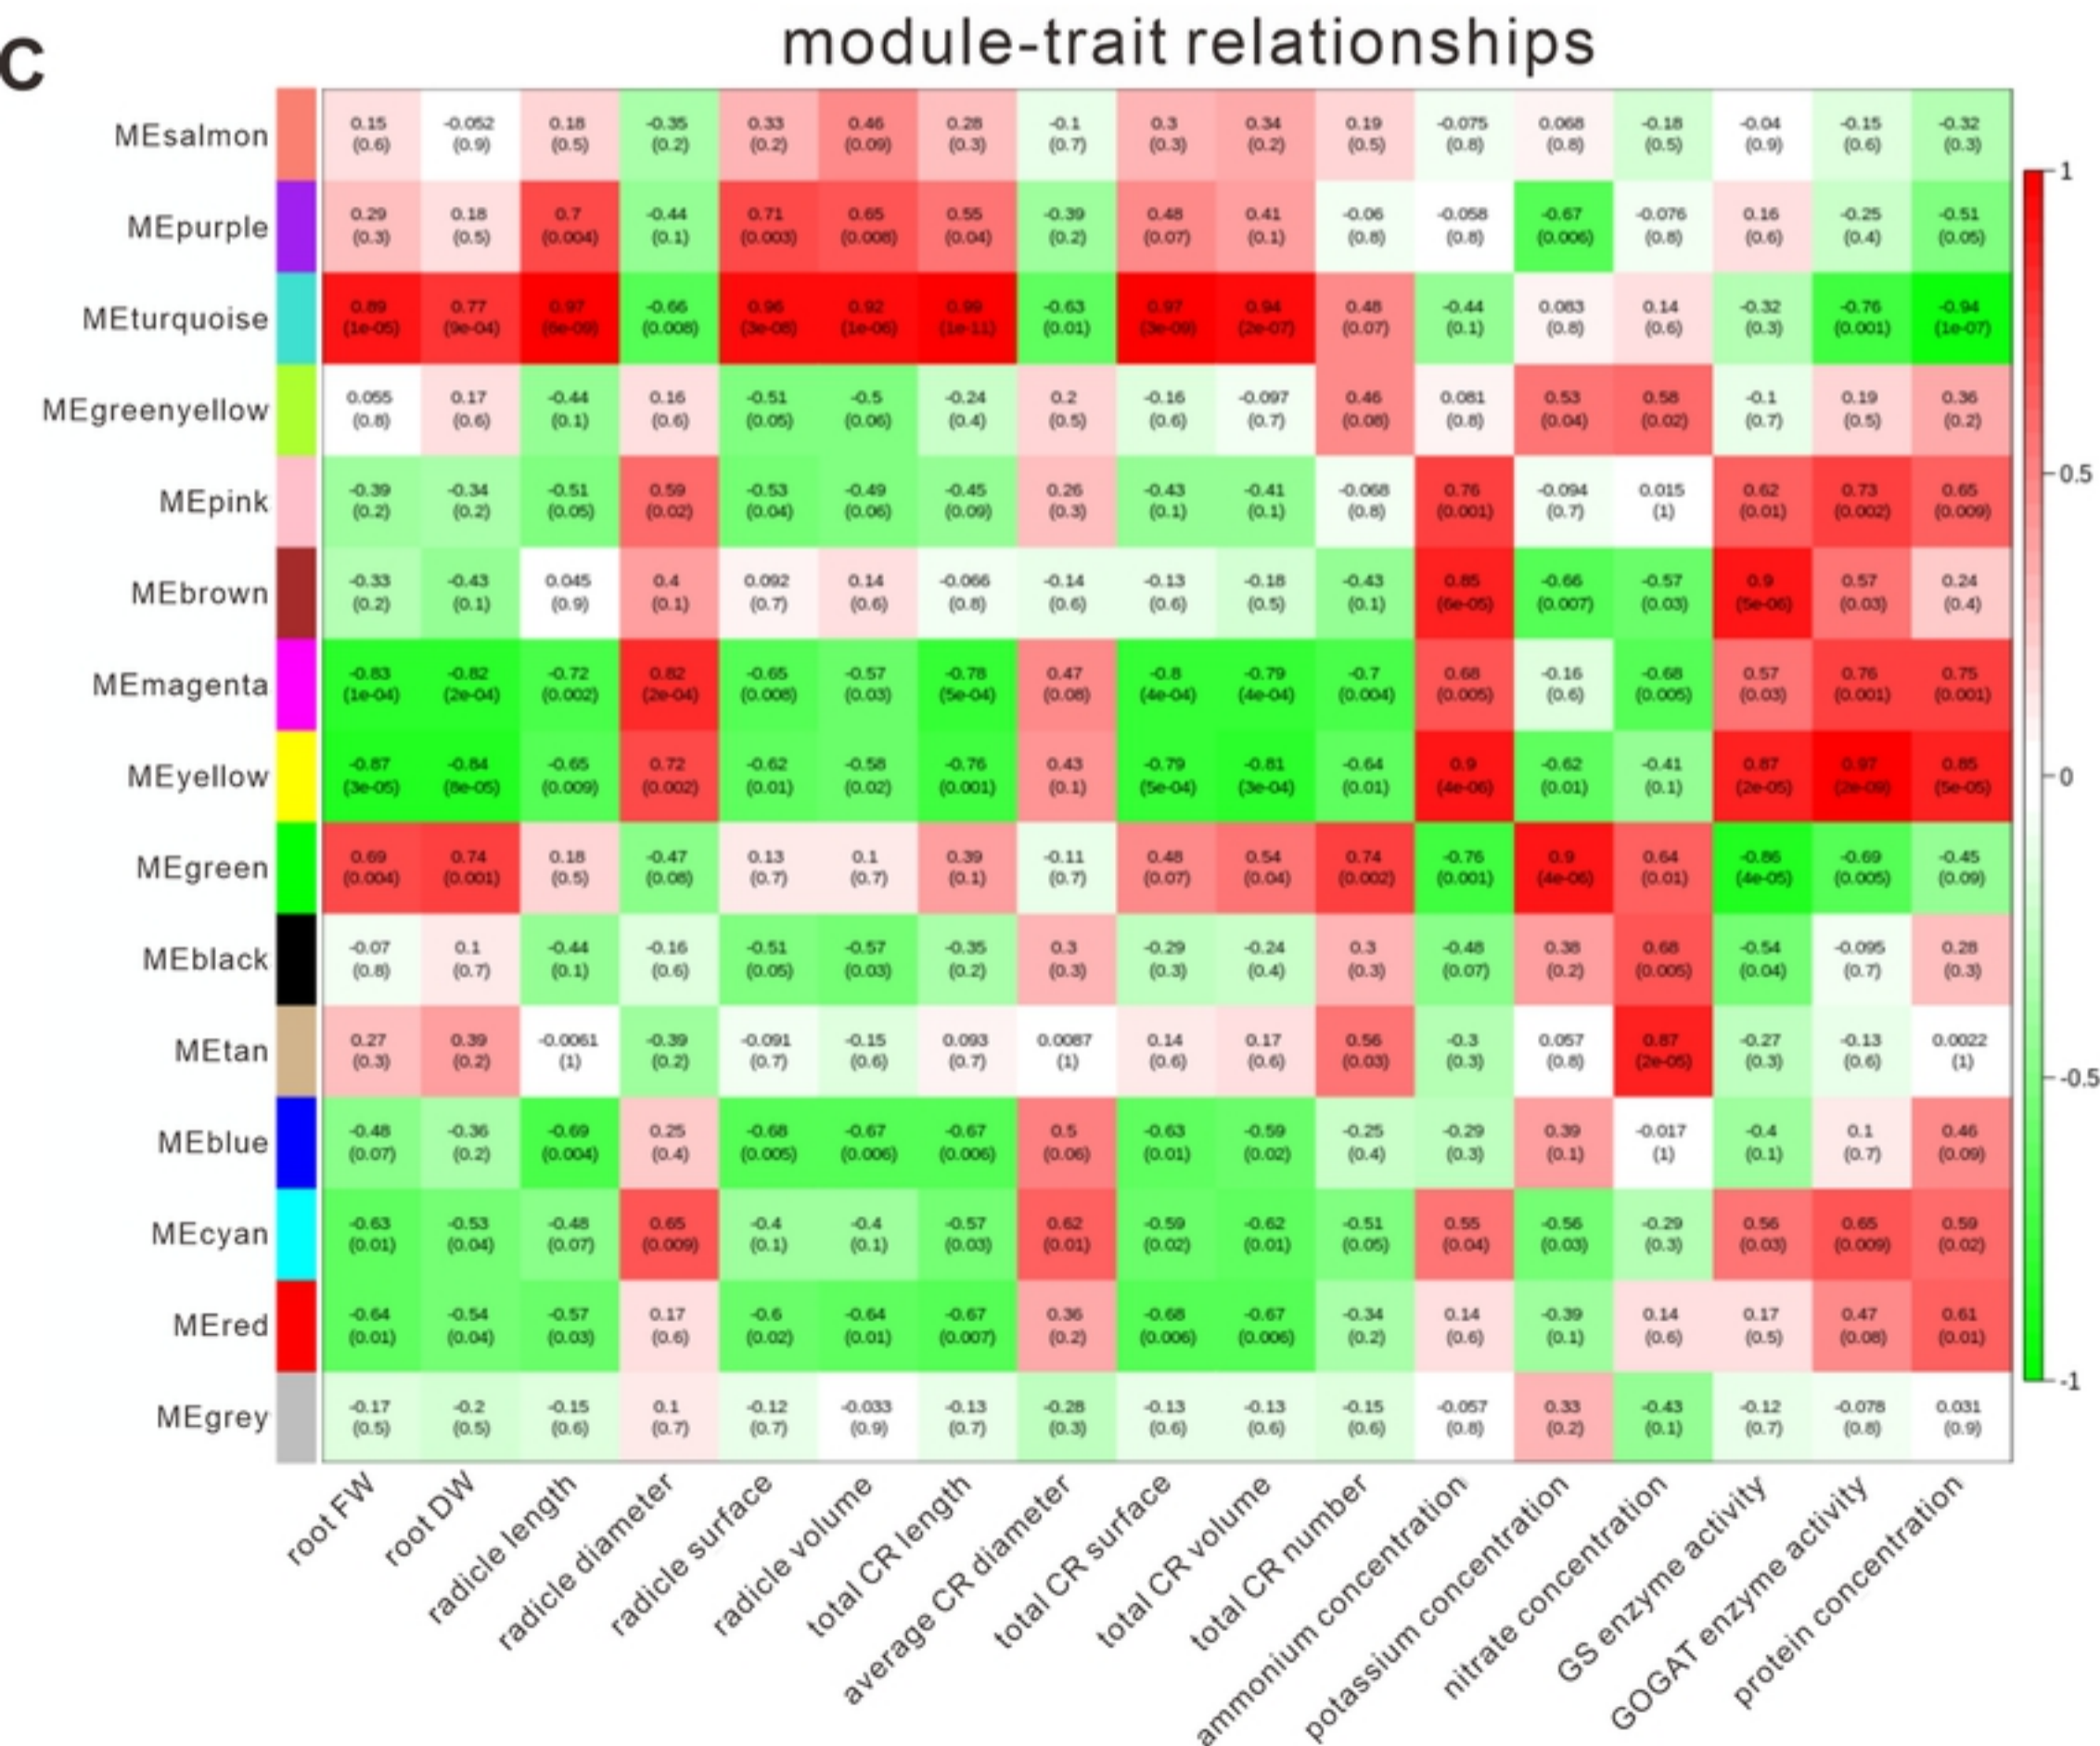

Figure 7

**A**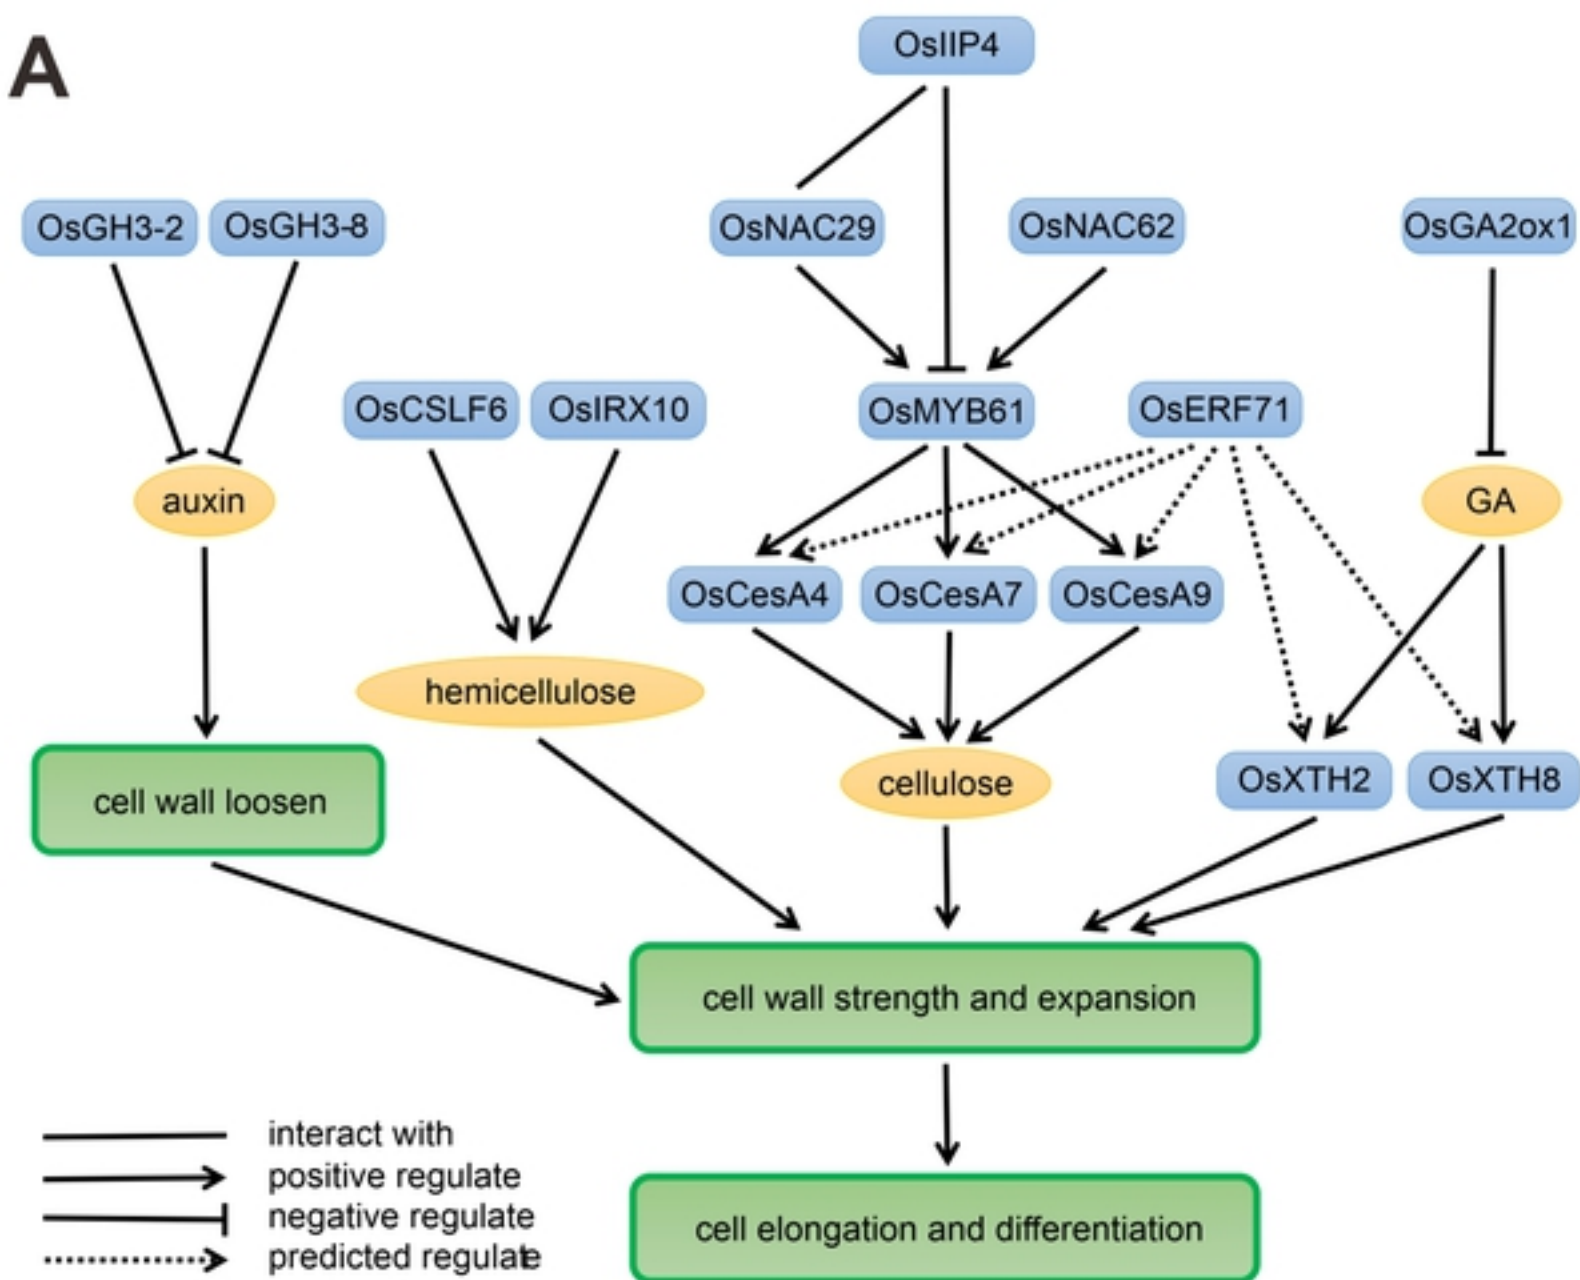**B**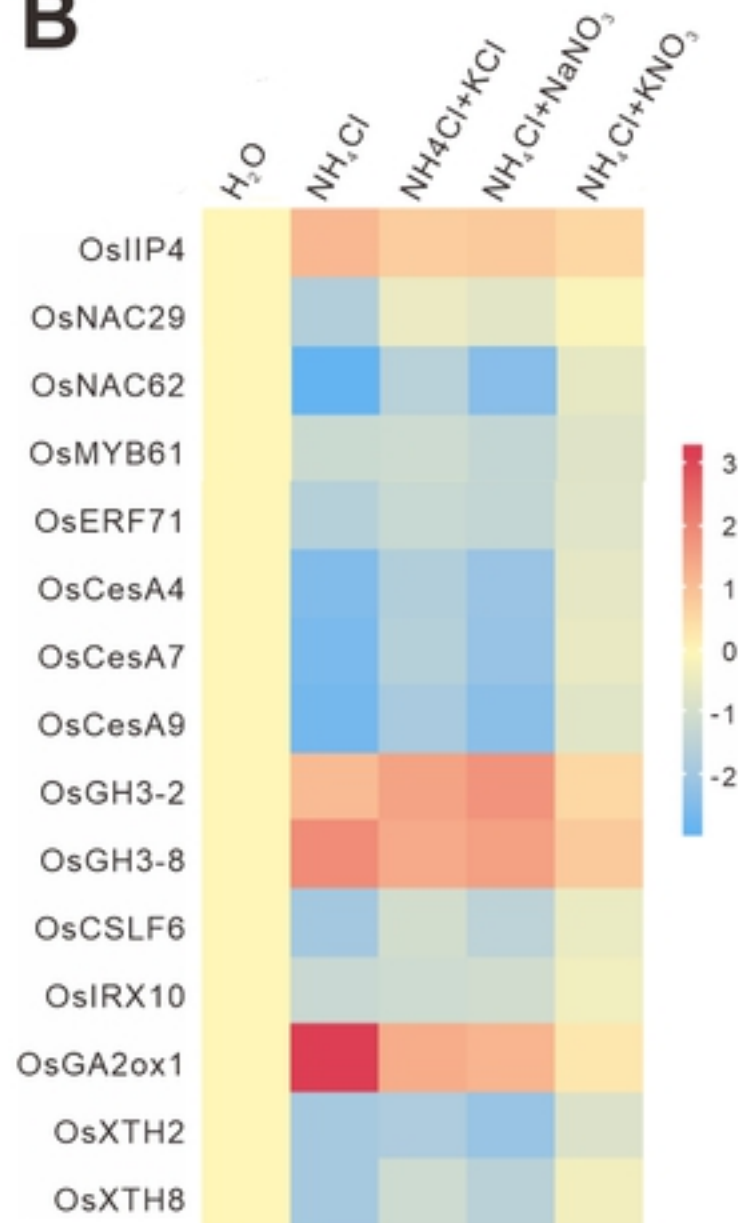

Figure 8
